# **A versatile human intestinal organoid-derived epithelial monolayer model for the study of enteric pathogens**

Kourtney P. Nickerson<sup>1,2±</sup>, Alejandro Llanos-Chea<sup>1,2±</sup>, Laura Ingano<sup>1±</sup>, Gloria Serena<sup>1,2</sup>, Alba Miranda-Ribera<sup>1,2</sup>, Meryl Perlman<sup>1,2±</sup>, Rosiane Lima<sup>1</sup>, Marcelo B. Sztein<sup>3</sup>, Alessio Fasano<sup>1,2</sup>, Stefania Senger<sup>1,2#\*</sup>, and Christina S. Faherty<sup>1,2#\*</sup>

<sup>1</sup>Mucosal Immunology and Biology Research Center, Division of Pediatric Gastroenterology and Nutrition, Massachusetts General Hospital; <sup>2</sup>Department of Pediatrics, Harvard Medical School, Boston, Massachusetts; <sup>3</sup>Center for Vaccine Development and Global Health, Department of Pediatrics, University of Maryland School of Medicine, Baltimore, Maryland

<sup>±</sup>Current addresses:

- Dr. Kourtney P. Nickerson, Charles River Labs, Wilmington, Massachusetts
- Dr. Alejandro Llanos-Chea, Division of Pediatric Gastroenterology, Hepatology, and Nutrition, Department of Pediatrics, University of Miami Miller School of Medicine
- Ms. Laura Ingano, Biogen, Cambridge, Massachusetts
- Dr. Meryl K. Perlman, Division of Gastroenterology, Hepatology, and Nutrition, Department of Pediatrics, Washington University School of Medicine in St. Louis

<sup>\*</sup>Equal contribution of authors

<sup>#</sup>Address correspondence to:

- Organoids: Dr. Stefania Senger, [ssenger@mgh.harvard.edu](mailto:ssenger@mgh.harvard.edu)
- Organoid infection: Dr. Christina S. Faherty, [csfaherty@mgh.harvard.edu](mailto:csfaherty@mgh.harvard.edu)

26

27 Running title: Enteric infection of a human intestinal organoid-derived model

28

29 Keywords: *Shigella*, *Salmonella*, *Escherichia coli*, infection models, human, intestinal, organoid,  
30 enteroid, HIODEM, DAPT, RANKL, epithelial monolayer, enterocytes, goblet cells, mucus, M cells

31

## 32 Abstract

33       Gastrointestinal infections cause significant morbidity and mortality worldwide. The complexity  
34 of human biology and limited insights into host-specific infection mechanisms are key barriers to current  
35 therapeutic development. Here, we demonstrate that two-dimensional epithelial monolayers derived  
36 from human intestinal organoids, combined with *in vivo*-like bacterial culturing conditions, provide  
37 significant advancements for the study of enteropathogens. Monolayers from the terminal ileum, cecum,  
38 and ascending colon recapitulated the composition of the gastrointestinal epithelium, in which several  
39 techniques were used to detect the presence of enterocytes, mucus-producing goblet cells, and other cell  
40 types following differentiation. Importantly, the addition of receptor activator of nuclear factor kappa-B  
41 ligand (RANKL) increased the presence of M cells, critical antigen-sampling cells often exploited by  
42 enteric pathogens. For infections, bacteria were grown under *in vivo*-like conditions known to induce  
43 virulence. Overall, interesting patterns of tissue tropism and clinical manifestations were observed.  
44 *Shigella flexneri* adhered efficiently to the cecum and colon; however, invasion in the colon was best  
45 following RANKL treatment. Both *Salmonella* Typhi and Typhimurium serovars displayed different  
46 infection patterns, with *S. Typhimurium* causing more destruction of the terminal ileum and *S. Typhi*  
47 infecting the cecum more efficiently than the ileum, particularly with regards to adherence. Finally,  
48 various pathovars of *Escherichia coli* validated the model by confirming only adherence was observed  
49 with these strains. This work demonstrates that the combination of human-derived tissue with targeted

bacterial growth conditions enables powerful analyses of human-specific infections that could lead to important insights into pathogenesis and accelerate future vaccine development.

## Importance

While traditional laboratory techniques and animal models have provided valuable knowledge in discerning virulence mechanisms of enteric pathogens, the complexity of the human gastrointestinal tract has hindered our understanding of physiologically relevant, human-specific interactions; and thus, has significantly delayed successful vaccine development. The human intestinal organoid-derived epithelial monolayer (HIODEM) model closely recapitulates the diverse cell populations of the intestine, allowing for the study of human-specific infections. Differentiation conditions permit the expansion of various cell populations, including M cells that are vital to immune recognition and the establishment of infection by some bacteria. We provide details of reproducible culture methods and infection conditions for the analyses of *Shigella*, *Salmonella*, and pathogenic *Escherichia coli* in which tissue tropism and pathogen-specific infection patterns were detected. This system will be vital for future studies that explore infection conditions, health status, or epigenetic differences; and will serve as a novel screening platform for therapeutic development.

## Introduction

Over 10 million pediatric deaths occur annually, with over half of these deaths resulting from microbial infection (1). Despite improvements in hygiene, availability of clean water, and access to treatment, few preventive therapies exist and pediatric mortality rates remain high (1-5). Gastrointestinal (GI) pathogens such as *Shigella*, *Salmonella*, and *Escherichia coli* cause diarrhea, dysentery, and even sepsis in some instances (6-10). Many of these pathogens are human-restricted, rendering traditional laboratory models insufficient for understanding disease pathologies in humans. In fact, the complexities

of human biology coupled with human-specific infection patterns are key barriers to understanding pathogenic mechanisms for successful vaccine development.

To overcome these barriers, we further developed methodology to transition human intestinal stem cells from spheroid cultures into single two-dimensional (2-D) cell monolayers that recapitulate the various cell types of the GI tract (11) and answer critical questions regarding how human-specific pathogens interact with host cells. Herein, we present detailed protocols to prepare human intestinal organoid-derived epithelial monolayers (HIODEM) isolated from the ileum, cecum, and ascending colon to test infection with *Shigella*, *Salmonella*, and pathogenic *E. coli*. Monolayers were composed of enterocytes, goblet cells, and other cell types of the various intestinal segments. Through ligand stimulation, the monolayer system was modified to promote expansion of the microfold (M) cell population of the follicle-associated epithelium often exploited by bacterial pathogens to gain access to the epithelium (12, 13). Both adherence and invasion of the three GI segment-derived models were examined with the various pathogens, and the role of M cells in enteric infections was evaluated for *Shigella* and *Salmonella*. We also utilized bacterial growth conditions that replicate the host environment to enhance the virulence of the pathogens prior to infection. In all, this combined methodology has significant potential to transition current research methods into the most human-specific, *in vivo*-like model to study bacterial pathogenesis and preclinically evaluate therapeutic candidates, potentially leading to paradigm-shifting approaches to vaccine or therapeutic development.

## Results

**The HIODEM model for studying enteric pathogenesis.** Organoids were derived from tissue biopsies collected from the terminal ileum, cecum, and ascending colon, and subcultured for monolayer generation. After isolation and propagation, crypt stem cells were dissociated into single cells and seeded onto transwell inserts. Monolayers reached confluency in 7 to 10 days, in which transepithelial electrical resistance (TEER) was monitored to indicate formation of functional barriers (14). TEER readings were

the highest in the terminal ileum averaging  $1010 \pm 112 \Omega \cdot \text{cm}^2$  with  $0.33 \text{ cm}^2$  transwells, whereas cecum monolayers averaged  $490 \pm 31 \Omega \cdot \text{cm}^2$  and the colon had much lower TEER values averaging at  $209 \pm 2.7 \Omega \cdot \text{cm}^2$  (**Table 1**). Following the stabilization of TEER readings, monolayers were treated with the  $\gamma$ -secretase inhibitor N-[N-(3,5-Difluorophenacetyl)-L-alanyl]-S-phenylglycine t-butyl ester (DAPT) (11, 15), with or without the receptor activator of nuclear factor kappa-B ligand (RANKL) (16) at physiological (100 ng/ml) or supraphysiological (500 ng/ml) doses for 24 or 48 hours to ensure differentiation and provide the immune stimulation to induce M cell expression (16-18).

Several methodologies were used to characterize the differentiated monolayers, including flow cytometry, reverse transcription qPCR (RT-qPCR), and transmission electron microscopy (TEM). We focused on ensuring the presence of enterocytes, mucus-producing goblet cells, and M cells, with other cell markers evaluated by RT-qPCR only. First, for flow cytometry, mature monolayers were examined using antibodies against the transcription factors ESE1 for enterocytes (19), KLF4 for goblet cells (20), and SPIB for M cells (17). The analyses confirmed the presence of the respective cellular markers and enabled us to estimate the cellular populations for each cell type (**Supplemental Figure S1**). Specifically, for the M cell phenotype, RANKL treatment increased the percentage of SPIB<sup>+</sup> cells relative to the DAPT only treatment across all tissue types with both doses of RANKL for 24 and 48 hours (**Figure 1**). Second, to confirm the induction of the *SPIB* gene with RANKL treatment, we analyzed gene expression at 24 hours following 100 ng/ml RANKL treatment (**Figure 2**). The RT-qPCR analyses revealed significant induction of *SPIB* expression with the DAPT + RANKL treatment relative to the DAPT only treatment, with no or minor changes in expression for *ESE1*, *KLF4*, and other cellular markers (**Figure 2** and **Table 2**). It is important to note that expression of *ESE1*, *KLF4*, and the other genes was detected in all conditions (data not shown), but the changes in expression were not significantly altered in DAPT + RANKL treatment compared to DAPT only treatment. Finally, mature monolayers were evaluated by TEM to visualize and confirm the various cell types, monolayer quality, and barrier formation (**Figure 3**). Characteristic features of enterocytes, goblet cells, and M cells were

visualized, which included the presence of microvilli for enterocytes, secretory granules for goblet cells, and the absence of microvilli for M cells (21-23). In all, the data demonstrated that multiple cellular populations were present in the HIODEM models evaluated under the differentiation conditions described above and that RANKL treatment increased the presence of M cells.

**Robust *Shigella* infection requires colonic M cells.** To validate the site of *Shigella* infection, we analyzed wild type *S. flexneri* strain 2457T infection in the terminal ileum, cecum, and colon-derived HIODEM by assaying for adherence and invasion. Prior to infection, *S. flexneri* was cultured in a combination of bile salts and glucose to replicate small intestinal transit (24-26). For adherence, approximately 5% of the bacterial inoculum adhered to ileum-derived HIODEM, while the adherence rates for cecum and colon-derived HIODEM models were nearly triple (~12-15%; **Figure 4A**). For invasion, rates were consistent across the models under most treatments; however, colon-derived monolayers differentiated with RANKL to promote the maturation of M cells consistently had a three-fold increase in invasion (**Figure 4B**). A virulence plasmid-cured, non-invasive strain of *S. flexneri* (strain BS103 (27)) was used as a negative control for invasion and was unable to invade the models under any conditions. Scanning electron microscopy (SEM) of *S. flexneri* infected colonic models demonstrated attachment to the apical surface of the cells (**Figure 4C**). The *S. flexneri* adherence pattern occurred throughout the surface of the monolayer. Additionally, shadowed areas beneath adherent bacteria appeared on cells lacking microvilli in the RANKL-treated samples, accompanied by perforations in other parts of the cells. These observations appear to be visual representations M cell transit required for *Shigella* invasion (28). Cross-section TEM verified these observations with visualization of invading bacteria localized to M cells (**Figure 4D**). Finally, to further validate the model, *S. flexneri*-infected colon HIODEM monolayers were evaluated for interleukin-8 (IL-8) and lactate dehydrogenase (LDH) release (**Supplemental Figure S2**) since *Shigella* infection is accompanied by IL-8 secretion (29, 30) and inhibition of epithelial cell death (31, 32). Significant IL-8 secretion from *S. flexneri* infection was observed while mock-treated cells had no detectable levels of IL-8. Additionally,

very low levels of LDH was detected for *S. flexneri*-infected monolayers with no significant difference to mock infected.

**Serovar-specific aspects of *Salmonella* infection are revealed using the HIODEM model.** To demonstrate versatility of the HIODEM model, monolayers derived from ileum, cecum, and colon tissue were used to examine adherence and invasion of wild type *Salmonella enterica* serovar Typhi strain Ty2 and serovar Typhimurium strain SL1344. *Salmonella* Typhi infection was more prevalent in the cecum, with a higher rate of adherence and a modest increase in invasion relative to the ileum (**Figure 5A**). Furthermore, infection of ileum HIODEMs treated with RANKL to promote M cell maturation did not result in a significant increase in intracellular bacteria (**Figure 5B**). Transmission electron microscopy of infected HIODEM cells revealed *S. Typhi* associated with the enterocyte surface, remodeled host cytoskeleton, or contained within intracellular vesicles (**Figure 5C**); while bacterial association with secreted mucus was also observed following immunostaining analysis (**Supplemental Figure S3**). Interestingly, infection comparison of the *S. Typhi* to *S. Typhimurium* analyses revealed serovar-specific infection patterns (**Figure 5D** and **5E**). Unlike *S. Typhi*, *S. Typhimurium* infected and replicated robustly within ileum monolayers with significant destruction of the monolayers revealed upon SEM analysis. Like the TEM, the SEM analysis of the *S. Typhi* infected monolayers showed bacteria interacting with enterocytes through bacterial surface structures binding to microvilli, with an overall pattern of surface association to intact monolayers. These results both verify our previous findings for *S. Typhi* infection (33) and demonstrate distinctions in serotype-specific infection patterns along different segments of the human GI tract.

**Model validation with pathogenic *Escherichia coli*.** Because the goal of the HIODEM system is to provide the most human-specific physiological model to analyze multiple enteric pathogens, validation of pathogenic *E. coli* infection would help support use of the model for a variety of bacteria. Since *Shigella* and *Salmonella* are both invasive pathogens, we decided to test the efficacy of our model on adherent, non-invasive pathogens while also reproducing similar analyses performed by another

group (11). Enteropathogenic (EPEC strain 2348/69), enterohemorrhagic (EHEC O157:H7 strain 933), and enteroaggregative (EAEC strain 042) *E. coli* infect different locations of the intestine (*i.e.*, ileum (34), colon (35), and colon (36), respectively). The ability of EPEC, EHEC, and EAEC to adhere or resist gentamicin was determined using organoids derived from the appropriate anatomical site specific to each pathogen in which the HIODEM monolayers were treated with DAPT only. Robust adherence for the three pathogens was detected in colon and ileum organoids; however, recoveries were minimal following gentamicin treatment (**Figure 6A**). To confirm these data, confocal immunofluorescence analysis (**Figure 6B**), SEM (**Figure 6C**), and TEM (**Figure 6D**) were performed. EPEC and EHEC adhered to the apical surface of the monolayers in tight association and indications of pedestal formation (37) were present, whereas EAEC adhered in an aggregative fashion (38). Interestingly, we found that the *E. coli* pathovars displayed a “hot-spot” infection pattern that was reproducible and consistent when imaged by various microscopy analyses. These results confirm the efficacy of the HIODEM model in recapitulating known phenotypes associated with pathogenic *E. coli* (11) and demonstrate the ability of the model to accommodate different pathogens for human cell infection analyses.

## Discussion

The use of human-derived intestinal organoids to study bacterial pathogenesis has recently increased (39-42). Prior to this advancement, most enteric pathogenesis studies were limited to immortalized cell lines and/or animal models. While traditional models have provided key insights into our understanding of enteric bacterial pathogens, successful vaccine development has been ineffective or limited (43-45). Animal models do not faithfully replicate the human GI tract (46-50) while immortalized cell lines have genetic abnormalities, dysregulated cell signaling pathways, and varied differentiation statuses depending on the cell line and the culturing conditions used (22, 51-53). Thus, there is a significant need to utilize human-specific infection models to improve our understanding of pathogenesis and to facilitate the development of efficacious vaccines against *Shigella*, *Salmonella*, and



pathogenic *E. coli*. Intestinal-derived organoid models provide a pluripotent platform to study host-pathogen interactions, in which differentiation reagents ensure the presence of multiple cell types of the human epithelium while regional specificity can be retained by obtaining biopsies from different segments of the GI tract. Given the complexity of the methodology and reagents, we have provided a detailed protocol of our procedure (**Supplemental Methods**) to share with the research community and facilitate host-pathogen studies.

Organoid-derived epithelial monolayer models like the HIODEM have enabled infection analyses by providing a process by which pathogens can directly interact with the apical side of the epithelium (11, 24, 33, 54-58). While three-dimensional organoid systems are available (40, 59-63) and “apical-out” organoid systems have been developed (64), HIODEM and other 2-D systems offer easily accessible monolayers for pathogenesis studies in which apical and basolateral cytokine secretion profiles and changes in TEER can be examined in a standard transwell culture setting. Similar to traditional polarized models with Caco-2 and T84 cells (65-67), the polarized monolayer of HIODEM allows for a robust infection without need of centrifuging bacteria onto the cells, which is a common practice for infection analyses performed with standard, nonpolarized cell lines (68-70). Finally, the high-throughput nature of the multi-well plate formats enable multiple monolayers to be assayed simultaneously. Possible comparative analyses include various bacterial strains or mutants, infection conditions, ligand treatment, or even screening platforms for therapeutic candidates (23). The possibilities for therapeutic evaluation are amplified by the ability to develop organoids from donors with different genetic backgrounds, environmental exposure, age, disease status, or tissue site. These factors are captured and maintained in the organoid cultures (15, 71, 72), thereby increasing the potential of the model for patient stratification and precision medicine applications.

For our HIODEM system, media composition and inhibitors were carefully chosen to maintain the stem cell phenotype during the organoid culturing phase, initiate differentiation when seeded onto monolayers, and promote terminal differentiation in the last 48 hours of monolayer culture prior to use

(see **Supplemental Methods**). Removal of the A-8301 inhibitor from the media when shifting from the organoid culture (1:1 + A-8301 + Y-27632) to the monolayer culture (1:1 + Y-27632) promotes cell attachment to the transwells (Dr. Senger's observations). As the monolayer culturing progresses, TEER measurements monitor polarization of the models, which will vary depending on the tissue of origin. As noted in **Table 1**, our TEER values were consistent with published values for other cell-based models on transwell systems in which measurements are highest in the proximal intestine and decrease toward the colon. Passage of fluorescein isothiocyanate (FITC) dextran from the apical medium to the basolateral medium is another method to confirm the TEER readings and integrity of the barrier, as we have previously performed (15, 33, 71). Finally, transitioning the cells from the monolayer growth medium (apical and basolateral 1:1 + Y-27632) to terminal differentiation medium (apical cDMEM/F12 + DAPT, basolateral 1:1) prior to infection experiments promotes final differentiation since the factors that maintain stemness are significantly reduced and only present on the basolateral side to replicate *in vivo* environments (73). Thus, the removal of apical stem cell factors in conjunction with the addition of DAPT are critical signals that prompt the cells to differentiate and mature into a tissue-like model. It is important to note that each HIODEM model retains the cellular programming from the site of origin, *i.e.* ileum, cecum, or colon, despite the overall pluripotent state of the stem cells (11, 15, 71).

One of our goals was to develop a physiologically-relevant infection model for *Shigella*. Given the infection paradigm in which *Shigella* requires the presence of antigen-sampling M cells to access the basolateral pole for invasion of colonic epithelial cells (28), we sought to utilize a reagent that promotes the differentiation of M cells. We used RANKL based on previous studies (74, 75). The RANKL treatment resulted in significant induction of SPIB expression as detected by flow cytometry (**Figure 1**) and RT-qPCR (**Figure 2**), as well as increased appearance of the M cell phenotype upon microscopic examination of the monolayers (**Figure 3**). These results were consistent with previous analyses (74, 75). The differences in the levels of SPIB expression in each model following RANKL treatment likely reflect the retention of cellular programming from the original biopsy source, as noted above. Importantly,

the expression of other cellular markers was not significantly altered with the use of RANKL (**Table 2** and **Supplemental Figure 1**). Thus, our results demonstrate that the cellular populations of the HIODEM models are capable of manipulation by ligand treatment to enable studies focused on specific cell types.

To examine the efficacy of the HIODEM models for pathogenesis, we evaluated *Shigella*, *Salmonella*, and pathogenic *E. coli* infection in models derived from the terminal ileum, cecum, and colon. Overall, we detected tissue tropism, pathogen targeting of specific cell types, and interesting infection dynamics by using models derived from the natural sites of infection. For *Shigella* (**Figure 4** and **Supplemental Figure S2**), adherence was highest in the cecum and colon, with the rates of both comparable to adherence rates with polarized T84 cells (26). Apical surface adherence was facilitated by *Shigella* adherence factors expressed in the *in vivo*-like culture conditions, and replicates previous analyses with both the colon and cecum models (23, 24, 26). Meanwhile, *Shigella* invasion was the highest in colon following treatment with RANKL to induce the presence of M cells. To confirm our data, we repeated analyses with another patient-derived colon model, and detected approximately a 10-fold increase in recovery in which the DAPT + RANKL treatment increased *S. flexneri* colonic invasion relative to DAPT treatment (data not shown). Overall, both sets of invasion rates were reduced relative to rates seen in nonpolarized HeLa cells (69) or direct basolateral administration of polarized T84 cells (67, 76), but these models promote almost complete infection of the host cells and bypass important steps during the infection process. Since the HIODEM model is composed of various cell types, we only expect *Shigella* infection of the enterocytes. Our results agree with two recent publications using variations to the organoid-derived monolayer model that also verified the colonic tropism and the basolateral entry preference for *Shigella* invasion (54, 55). In this study, microscopy analyses indicated bacterial transit of M cells, which complements both previous confocal microscopy analyses indicating *Shigella* translocation of cecum-derived organoids following apical administration (23) and the invasion data rates obtained in the analyses described here. Furthermore, infection with the virulence plasmid-cured strain BS103 resulted in minimal recovery of the bacteria following gentamicin treatment,

confirming that wild type 2457T recoveries in the presence of gentamicin were due to bacterial invasion of the model. In all, the bacterial culture conditions, apical administration of the inoculum, and the use of RANKL to promote M cell differentiation enables human-specific conditions to replicate the natural *Shigella* infection process in the laboratory setting.

In the literature, both *S. Typhi* and *S. Typhimurium* have been reported to infect the ileum (77-81), but result in differing pathologies: either systemic infection in the case *S. Typhi* or localized gastroenteritis in the case of *S. Typhimurium*. To explore this phenomenon in the HIODEM model, we analyzed infection of both serotypes in the ileum, cecum, and colon (**Figure 5** and **Supplemental Figure S3**). As with the *Shigella* analyses, we used bacterial culture conditions to induce virulence factor expression. Thus, *S. Typhi* was cultured with high-salt media and static growth to as previously described (33, 82) and the same protocol was used for *S. Typhimurium* to maintain similar growth conditions. The infection analyses demonstrated a surprising result that *S. Typhi* preferentially infected the cecum, while *S. Typhimurium* preferentially infected the ileum and caused more cellular destruction relative to *S. Typhi*. Furthermore, treatment of ileum-derived HIODEM monolayers with RANKL to induce M cell differentiation did not enhance *S. Typhi* invasion, which contrasts with *S. Typhimurium* observations (75) but is consistent with our previous analyses that *S. Typhi* invades human biopsies via the apical surface of enterocytes in which no bacterial associations with M cells were detected (33). Thus, the HIODEM model reproduced the serovar-specific differences that are expected given the different GI pathologies associated with each pathogen, while also identifying a unique cecum-specific infection pattern for *S. Typhi*. Reports of *S. Typhi* infection or damage to the cecum have been documented in the literature. Colonoscopic evaluations of patients with typhoid fever have found intestinal lesions in the terminal ileum in all patients tested, with additional lesions identified by the ileocecal valve and ascending colon (83). Furthermore, perforations of the ileocecum or lower gastrointestinal bleeding associated with the cecal artery have been reported in patients with *S. Typhi* infection (84, 85). Therefore, the HIODEM system offers opportunities to understand key differences between *S. Typhi* and *S.*

299 Typhimurium, which may correlate with genetic differences of the pathogens (86) and/or epigenetic  
300 differences in humans.

301 Finally, the *E. coli* pathovar analyses validated the HIODEM system as a human-specific model  
302 that recapitulates expected infection patterns. Robust infection of the appropriate site of GI tract was  
303 observed with each pathovar, with comparable rates of adherence and minimal recoveries upon  
304 gentamicin to indicate a lack of invasion. The infection patterns and microscopic evaluations are in  
305 agreement with previous and recent analyses of organoid monolayer-based systems (11, 56, 57, 72), as  
306 well as with established literature regarding actin association and pedestal formation, or aggregative  
307 adherence patterns (37, 38). As with *Shigella* and *Salmonella* analyses, the future applications of the  
308 HIODEM model system with all *E. coli* pathotypes are broad and expected to provide key insights into  
309 human-specific pathology, including infection analyses in other segments of the GI tract for each  
310 pathovar.

311 In summary, we have provided reproducible infection analyses of six bacterial pathogens  
312 spanning three genera, in which unique observations have already been provided and infection data have  
313 been verified with electron microscopic analyses. This model and approach can be applied to additional  
314 enteric pathogens or bacteria representing the human microbiota. Coupled with *in vivo*-like bacterial  
315 culture conditions, the HIODEM model offers one of the most human-specific infection analyses that  
316 can be performed in the laboratory setting to further our understanding of host-microbe interactions and  
317 hopefully help lead to the discovery of novel vaccines and therapeutics.

318

## 319 **Methods and Materials**

320 **Human Subjects Research, IRB Approval, and Biopsy Collection.** Human sample collection  
321 was approved by Institutional Review Board (IRB) protocols 2014P002001 and 2015P001908 of the  
322 Massachusetts General Hospital, Boston, MA. Donor tissue was obtained from consenting patients

undergoing medically required colonoscopies or surgical resections, as determined by a licensed physician. All subjects provided written informed consent for samples to be used for research purposes.

**Organoid Culture and Monolayer Generation.** The protocol has been adapted from previous publications (11, 15, 33). Please refer to the **Supplemental Methods** for step-by-step instructions. Briefly, stem cells derived from donor biopsies were maintained in Matrigel culture in a 1:1 mixture of intestinal stem cell media (ISC) + L-WRN conditioned media containing the inhibitors Y-27632 and A-83-01. Cells were seeded at a density of 15,000 cells per Matrigel dome and grown for 7 days in culture. Spheres were trypsinized into a single-cell state, seeded onto polyethylene terephthalate (PET) membrane transwell inserts with a 0.4- $\mu$ m pore size at  $1.0 \times 10^6$  cells/ml, and incubated in the 1:1 stem cell medium–L-WRN medium at 37°C with 5% CO<sub>2</sub>. The culture medium was changed every other day until the cultures reached confluence, as determined by transepithelial electrical resistance (TEER) monitoring and microscopic observation. Cells grew and matured for 7-10 days, at which time the apical and basolateral media were changed and differentiation reagents were applied for either 24 or 48 hours depending on the experiment. Differentiation reagents included 5  $\mu$ M  $\gamma$ -secretase inhibitor IX (DAPT; Calbiochem) application to the apical surface, which was also combined with 100 or 500 ng/ml of the receptor activator of the NF- $\kappa$ B ligand (RANKL; Peprotech) application to the basolateral media where indicated.

**Infection analyses.** Please refer to the detailed protocols in the **Supplemental Methods**.

**Transepithelial electrical resistance (TEER).** To assess paracellular permeability, transwell inserts were monitored using a TEER apparatus (World Precision Instruments, Sarasota, FL) per manufacturer’s instructions (15, 33, 66).

**Reverse transcription quantitative PCR (RT-qPCR) analysis.** RNA was extracted from monolayers using Trizol (ThermoFisher) and Direct-Zol (Zymo) RNA extraction kit. RNA was treated with on-column DNase. RNA was converted to cDNA using Thermo Scientific Maxima First Strand cDNA Synthesis Kit. Gene expression quantitation was determined using Sybr Green (Perfecta) and The

CFX96 real-time polymerase chain reaction (PCR) detection system (Qiagen, Venio, NL) was used for gene expression analysis. The relative threshold cycle ( $\Delta\Delta CT$ ) method was used for assessing gene expression relative to the 18S housekeeping reference gene (15, 33). Identification of cell type was based on the following genes: *LGR5* (87-89) for stem cells; *ESE1* (19) and *SIM* (sucrose isomaltase) (90) for enterocytes; *KLF4* (20) and *MUC2* (91) for goblet cells; *SPIB* for M cells (17); *CGA* (92) and *NEUROD* (93) for enteroendocrine cells; *OCLDN* (occludin) (94, 95) for barrier formation; and *SOX9* (96, 97), *SPDEF* (96, 98), and *LYZ* (lysozyme) (99, 100) for Paneth cells.

**Flow Cytometry.** After differentiation, large transwells (12-well plates) were trypsinized for 10 minutes. Cells were subsequently resuspended in cDMEM and kept on ice until staining. Cells were fixed, permeabilized, and stained with flow cytometry fixation and permeabilization buffer kit as directed by the manufacturer. Briefly cells were washed twice with 1X PBS (Gibco), resuspended in 500  $\mu$ l of Flow Cytometry Fixation buffer (R&D), and incubated for 10 minutes at room temperature. Following fixation, cells were permeabilized with 200  $\mu$ l of Flow Cytometry Permeabilization/Wash buffer (R&D), stained with anti-human ESE1 (Abcam), anti-human KLF4 APC-conjugated (R&D System) and anti-human SPIB (Invitrogen) antibodies by incubating for 45 minutes at 4°C. Afterwards, the excess antibodies were removed by washing the cells with Flow Cytometry Permeabilization/Wash buffer and stained with secondary antibodies anti-rabbit IgG1 FITC (Abcam) and anti-mouse IgG2 PerCp (BD Bioscience) for 20 minutes at 4°C. Samples were washed again with Flow Cytometry Permeabilization/Wash buffer, fixed in 1% paraformaldehyde in 1X PBS (Gibco), and acquired with BD FACSCalibur flow cytometer. Analysis was performed with BD bioscience software. Enterocytes (*ESE1*<sup>+</sup>), M cells (*SPIB*<sup>+</sup>), and Goblet cells (*KLF4*<sup>+</sup>) were gated among live cells based on FSC and SSC parameters.

**Electron microscopy.** For transmission electron microscopy (TEM) analysis, samples were fixed in 2% paraformaldehyde/2.5% glutaraldehyde in 0.1 M Sodium Cacodylate followed by mounting on grids and imaged using a transmission electron microscope (JEOL, Peabody, MA). For scanning



electron microscopy (SEM) analysis, HIODEM monolayers were fixed in 0.5X Karnovsky fixative (Newcomer Supply) and subsequently stored in 1X PBS at 4°C. All sample processing occurred at the Massachusetts Eye and Ear Infirmary core facility. All SEM imaging was performed at the Harvard University Center for Nanoscale Systems (CNS) using a FESEM Supra55VP microscope.

**Cytokine Analysis.** Quantification of secreted interleukin 8 (IL-8) was conducted using R&D Systems Human CXCL8/IL-8 DuoSet ELISA per manufacturer's instructions (101).

**Lactate dehydrogenase (LDH) assay.** Apical supernatants were assessed for LDH release using Promega Cyttox Kit (Promega, Madison, WI) according to manufacturer's instructions (33).

**Immunostaining.** For immunostaining, monolayers were fixed in 4% paraformaldehyde at room temperature for 15 minutes followed by storage in 70% ethanol at 4°C until paraffin embedding (33). Embedding and sectioning were performed by the Specialized Histopathology Core of Massachusetts General Hospital. Prior to staining, sections were deparaffinized using xylene with gradual rehydration in decreasing concentrations of ethanol. Sections were blocked using 0.4% goat and donkey serum in 0.04% Triton X-100 in PBS. Sections were stained using the antibodies against actin (Cell Signaling Technologies, 3700S), Mucin 2 (Santa Cruz Technologies, sc-13312 (33)), *Salmonella* (Bio-rad, 8209-4006) and *E. coli* (Abcam, ab137967, kind gift of Deepak VK Kumar). Fluorescently conjugated secondary monoclonal antibodies (Alexa Fluor 488 and 555 conjugated antibody series against mouse, rabbit, or goat from Life Technologies) were used for detection. Nuclei were counterstained with 6-diamidino-2-phenylindole (DAPI). Samples were imaged using a Nikon A1SiR confocal microscope.

## Acknowledgements

The authors gratefully acknowledge Dr. Francis Colizzo, Dr. James Michael Richter, and Dr. Barbara Nath for collection of the samples. Without their technical expertise, these studies would not have been possible. We also thank Dr. Bobby Cherayil and Dr. Brian Hurly for bacterial strains used in this study, Ms. Diane Capen for her expertise and skill in preparing the samples for TEM analysis, Ms.



Ann Tisdale for her expertise in preparing the SEM samples, and Dr. Tim Cavanaugh and the Center for Nanoscale Studies at Harvard University for use of the SEM. We would also like to thank Dr. M. Rosaria Fiorentino, members of the Fasano, Fiorentino, and Faherty laboratories, Dr. Beth McCormick at the University of Massachusetts Medical School, as well as the members of the University of Maryland Cooperative Center on Human Immunology (CCHI) for their thoughtful feedback and discussions during the project.

This work was supported by the National Institute of Allergy and Infectious Diseases grants K22 AI104755 (CSF), and R01-AI036525 (MBS), NIH U19-AI082655 Cooperative Center on Human Immunology (MBS and AF), and DHHS U19-AI109776 (Center of Excellence for Translational Research, CETR, MBS). The TEM core is supported by National Institute of Neurological Disorders and Stroke P30NS045776. Support for the Philly Dake Electron Microscope Facility was provided by the National Institutes of Health grant 1S10RR023594S10 and by funds from the Dake Family Foundation. The Dana-Farber/Harvard Cancer Center Specialized Histopathology Core is supported, in part, by an NCI Cancer Center Support Grant # NIH 5 P30 CA06516. The funders had no role in study design, data collection and analysis, decision to publish, or preparation of the manuscript. Dr. Senger discloses the following conflicts of interest: PFE, BABA, and KLDO stock holdings.

## References

1. **Bryce J, Boschi-Pinto C, Shibuya K, Black RE, Group WHOCHER.** 2005. WHO estimates of the causes of death in children. *Lancet* **365**:1147-1152.
2. **Lima IF, Havt A, Lima AA.** 2015. Update on molecular epidemiology of Shigella infection. *Curr Opin Gastroenterol* **31**:30-37.
3. **Kotloff KL, Nataro JP, Blackwelder WC, Nasrin D, Farag TH, Panchalingam S, Wu Y, Sow SO, Sur D, Breiman RF, Faruque AS, Zaidi AK, Saha D, Alonso PL, Tamboura B, Sanogo D, Onwuchekwa U, Manna B, Ramamurthy T, Kanungo S, Ochieng JB, Omere R, Oundo JO, Hossain A, Das SK, Ahmed S, Qureshi S, Quadri F, Adegbola RA, Antonio M, Hossain MJ, Akinsola A, Mandomando I, Nhampossa T, Acacio S, Biswas K, O'Reilly CE, Mintz ED, Berkeley LY, Muhsen K, Sommerfelt H, Robins-Browne RM, Levine MM.** 2013. Burden and aetiology of diarrhoeal disease in infants and young children in developing countries

(the Global Enteric Multicenter Study, GEMS): a prospective, case-control study. *Lancet* **382**:209-222.

4. **Collaborators GBD**. 2017. Estimates of global, regional, and national morbidity, mortality, and aetiologies of diarrhoeal diseases: a systematic analysis for the Global Burden of Disease Study 2015. *Lancet Infect Dis* **17**:909-948.

5. **Kirk MD, Pires SM, Black RE, Caipo M, Crump JA, Devleeschauwer B, Dopfer D, Fazil A, Fischer-Walker CL, Hald T, Hall AJ, Keddy KH, Lake RJ, Lanata CF, Torgerson PR, Havelaar AH, Angulo FJ**. 2015. World Health Organization Estimates of the Global and Regional Disease Burden of 22 Foodborne Bacterial, Protozoal, and Viral Diseases, 2010: A Data Synthesis. *PLoS Med* **12**:e1001921.

6. **Clements A, Young JC, Constantinou N, Frankel G**. 2012. Infection strategies of enteric pathogenic *Escherichia coli*. *Gut Microbes* **3**:71-87.

7. **Azmatullah A, Qamar FN, Thaver D, Zaidi AK, Bhutta ZA**. 2015. Systematic review of the global epidemiology, clinical and laboratory profile of enteric fever. *J Glob Health* **5**:020407.

8. **Schnupf P, Sansonetti PJ**. 2019. Shigella Pathogenesis: New Insights through Advanced Methodologies. *Microbiol Spectr* **7**.

9. **Wain J, Hendriksen RS, Mikoleit ML, Keddy KH, Ochiai RL**. 2015. Typhoid fever. *Lancet* **385**:1136-1145.

10. **Jajere SM**. 2019. A review of *Salmonella enterica* with particular focus on the pathogenicity and virulence factors, host specificity and antimicrobial resistance including multidrug resistance. *Vet World* **12**:504-521.

11. **VanDussen KL, Marinshaw JM, Shaikh N, Miyoshi H, Moon C, Tarr PI, Ciorba MA, Stappenbeck TS**. 2015. Development of an enhanced human gastrointestinal epithelial culture system to facilitate patient-based assays. *Gut* **64**:911-920.

12. **Man AL, Prieto-Garcia ME, Nicoletti C**. 2004. Improving M cell mediated transport across mucosal barriers: do certain bacteria hold the keys? *Immunology* **113**:15-22.

13. **Sansonetti PJ, Phalipon A**. 1999. M cells as ports of entry for enteroinvasive pathogens: mechanisms of interaction, consequences for the disease process. *Semin Immunol* **11**:193-203.

14. **Srinivasan B, Kolli AR, Esch MB, Abaci HE, Shuler ML, Hickman JJ**. 2015. TEER measurement techniques for in vitro barrier model systems. *J Lab Autom* **20**:107-126.

15. **Senger S, Ingano L, Friere R, Anselmo A, Zhu W, Sadreyev R, Walker A, Fasano A**. 2018. Human fetal-derived enterospheres provide insights on intestinal development and a novel model to study Necrotizing Enterocolitis (NEC). *Cellular and Molecular Gastroenterology and Hepatology* **5**:549-568.

- 476 16. **Knoop KA, Kumar N, Butler BR, Sakthivel SK, Taylor RT, Nochi T, Akiba H, Yagita H,**  
477 **Kiyono H, Williams IR.** 2009. RANKL is necessary and sufficient to initiate development of  
478 antigen-sampling M cells in the intestinal epithelium. *J Immunol* **183**:5738-5747.  
479
- 480 17. **Mabbott NA, Donaldson DS, Ohno H, Williams IR, Mahajan A.** 2013. Microfold (M) cells:  
481 important immunosurveillance posts in the intestinal epithelium. *Mucosal Immunol* **6**:666-677.  
482
- 483 18. **Wood MB, Rios D, Williams IR.** 2016. TNF-alpha augments RANKL-dependent intestinal M  
484 cell differentiation in enteroid cultures. *Am J Physiol Cell Physiol* **311**:C498-507.  
485
- 486 19. **Oettgen P, Alani RM, Barcinski MA, Brown L, Akbarali Y, Boltax J, Kunsch C, Munger**  
487 **K, Libermann TA.** 1997. Isolation and characterization of a novel epithelium-specific  
488 transcription factor, ESE-1, a member of the ets family. *Mol Cell Biol* **17**:4419-4433.  
489
- 490 20. **Katz JP, Perreault N, Goldstein BG, Lee CS, Labosky PA, Yang VW, Kaestner KH.** 2002.  
491 The zinc-finger transcription factor Klf4 is required for terminal differentiation of goblet cells in  
492 the colon. *Development* **129**:2619-2628.  
493
- 494 21. **Ahmad T, Gogarty M, Walsh EG, Brayden DJ.** 2017. A comparison of three Peyer's patch  
495 "M-like" cell culture models: particle uptake, bacterial interaction, and epithelial histology. *Eur*  
496 *J Pharm Biopharm* **119**:426-436.  
497
- 498 22. **Lievin-Le Moal V, Servin AL.** 2013. Pathogenesis of human enterovirulent bacteria: lessons  
499 from cultured, fully differentiated human colon cancer cell lines. *Microbiol Mol Biol Rev*  
500 **77**:380-439.  
501
- 502 23. **Llanos-Chea A, Citorik RJ, Nickerson KP, Ingano L, Serena G, Senger S, Lu TK, Fasano**  
503 **A, Faherty CS.** 2019. Bacteriophage Therapy Testing against *Shigella flexneri* in a Novel  
504 Human Intestinal Organoid-Derived Infection Model. *J Pediatr Gastroenterol Nutr* **68**:509-516  
505 .
- 506 24. **Chanin RB, Nickerson KP, Llanos-Chea A, Sistrunk JR, Rasko DA, Kumar DKV, de la**  
507 **Parra J, Auclair JR, Ding J, Li K, Dogiparthi SK, Kusber BJD, Faherty CS.** 2019. *Shigella*  
508 *flexneri* Adherence Factor Expression in In Vivo-Like Conditions. *mSphere* **4**:pii: e00751-  
509 00719.  
510
- 511 25. **Nickerson KP, Chanin RB, Sistrunk JR, Rasko DA, Fink PJ, Barry EM, Nataro JP,**  
512 **Faherty CS.** 2017. Analysis of *Shigella flexneri* Resistance, Biofilm Formation, and  
513 Transcriptional Profile in Response to Bile Salts. *Infect Immun* **85**: e01067-16.  
514
- 515 26. **Faherty CS, Redman JC, Rasko DA, Barry EM, Nataro JP.** 2012. *Shigella flexneri* effectors  
516 *OspE1* and *OspE2* mediate induced adherence to the colonic epithelium following bile salts  
517 exposure. *Mol Microbiol* **85**:107-121.  
518
- 519 27. **Maurelli AT, Blackmon B, Curtiss R, 3rd.** 1984. Loss of pigmentation in *Shigella flexneri* 2a  
520 is correlated with loss of virulence and virulence-associated plasmid. *Infect Immun* **43**:397-401.  
521
- 522 28. **Mattock E, Blocker AJ.** 2017. How Do the Virulence Factors of *Shigella* Work Together to  
523 Cause Disease? *Front Cell Infect Microbiol* **7**:64.  
524

29. **Sansonetti PJ, Arondel J, Huerre M, Harada A, Matsushima K.** 1999. Interleukin-8 controls bacterial transepithelial translocation at the cost of epithelial destruction in experimental shigellosis. *Infect Immun* **67**:1471-1480.
30. **Philpott DJ, Yamaoka S, Israel A, Sansonetti PJ.** 2000. Invasive *Shigella flexneri* activates NF-kappa B through a lipopolysaccharide-dependent innate intracellular response and leads to IL-8 expression in epithelial cells. *J Immunol* **165**:903-914.
31. **Mantis N, Prevost MC, Sansonetti P.** 1996. Analysis of epithelial cell stress response during infection by *Shigella flexneri*. *Infect Immun* **64**:2474-2482.
32. **Faherty CS, Merrell DS, Semino-Mora C, Dubois A, Ramaswamy AV, Maurelli AT.** 2010. Microarray analysis of *Shigella flexneri*-infected epithelial cells identifies host factors important for apoptosis inhibition. *BMC Genomics* **11**:272.
33. **Nickerson KP, Senger S, Zhang Y, Lima R, Patel S, Ingano L, Flavahan WA, Kumar DKV, Fraser CM, Faherty CS, Sztein MB, Fiorentino M, Fasano A.** 2018. Salmonella Typhi Colonization Provokes Extensive Transcriptional Changes Aimed at Evading Host Mucosal Immune Defense During Early Infection of Human Intestinal Tissue. *EBioMedicine pii: S2352-3964*:30133-30136.
34. **Humphries RM, Armstrong GD.** 2010. Sticky situation: localized adherence of enteropathogenic *Escherichia coli* to the small intestine epithelium. *Future Microbiol* **5**:1645-1661.
35. **Farfan MJ, Torres AG.** 2012. Molecular mechanisms that mediate colonization of Shiga toxin-producing *Escherichia coli* strains. *Infect Immun* **80**:903-913.
36. **Harrington SM, Dudley EG, Nataro JP.** 2006. Pathogenesis of enteroaggregative *Escherichia coli* infection. *FEMS Microbiol Lett* **254**:12-18.
37. **Singh V, Davidson A, Hume PJ, Koronakis V.** 2019. Pathogenic *Escherichia coli* Hijacks GTPase-Activated p21-Activated Kinase for Actin Pedestal Formation. *mBio* **10**.
38. **Imuta N, Nishi J, Tokuda K, Fujiyama R, Manago K, Iwashita M, Sarantuya J, Kawano Y.** 2008. The *Escherichia coli* efflux pump TolC promotes aggregation of enteroaggregative *E. coli* 042. *Infect Immun* **76**:1247-1256.
39. **Zachos NC, Kovbasnjuk O, Foulke-Abel J, In J, Blutt SE, de Jonge HR, Estes MK, Donowitz M.** 2016. Human Enteroids/Colonoids and Intestinal Organoids Functionally Recapitulate Normal Intestinal Physiology and Pathophysiology. *J Biol Chem* **291**:3759-3766.
40. **Verma S, Senger S, Cherayil BJ, Faherty CS.** 2020. Spheres of Influence: Insights into Salmonella Pathogenesis from Intestinal Organoids. *Microorganisms* **8**.
41. **Ranganathan S, Smith EM, Foulke-Abel JD, Barry EM.** 2020. Research in a time of enteroids and organoids: how the human gut model has transformed the study of enteric bacterial pathogens. *Gut Microbes* **12**:1795492.

- 574 42. **Yin Y, Zhou D.** 2018. Organoid and Enteroid Modeling of Salmonella Infection. *Front Cell*  
575 *Infect Microbiol* **8**:102.
- 576
- 577 43. **Croxen MA, Law RJ, Scholz R, Keeney KM, Wlodarska M, Finlay BB.** 2013. Recent  
578 advances in understanding enteric pathogenic *Escherichia coli*. *Clin Microbiol Rev* **26**:822-880.
- 579
- 580 44. **Crump JA, Sjolund-Karlsson M, Gordon MA, Parry CM.** 2015. Epidemiology, Clinical  
581 Presentation, Laboratory Diagnosis, Antimicrobial Resistance, and Antimicrobial Management  
582 of Invasive Salmonella Infections. *Clin Microbiol Rev* **28**:901-937.
- 583
- 584 45. **Puzari M, Sharma M, Chetia P.** 2017. Emergence of antibiotic resistant *Shigella* species: A  
585 matter of concern. *J Infect Public Health* doi:10.1016/j.jiph.2017.09.025.
- 586
- 587 46. **Barry EM, Pasetti MF, Sztein MB, Fasano A, Kotloff KL, Levine MM.** 2013. Progress and  
588 pitfalls in *Shigella* vaccine research. *Nat Rev Gastroenterol Hepatol* **10**:245-255.
- 589
- 590 47. **Higginson EE, Simon R, Tennant SM.** 2016. Animal Models for Salmonellosis: Applications  
591 in Vaccine Research. *Clin Vaccine Immunol* **23**:746-756.
- 592
- 593 48. **Pitisuttithum P, Islam D, Chamnanchanunt S, Ruamsap N, Khantapura P, Kaewkungwal**  
594 **J, Kittitrakul C, Luvira V, Dhitavat J, Venkatesan MM, Mason CJ, Bodhidatta L.** 2016. A  
595 clinical trial of an oral live *Shigella sonnei* vaccine candidate, WRSS1, in Thai adults. *Clin*  
596 *Vaccine Immunol* doi:10.1128/CVI.00665-15.
- 597
- 598 49. **Gohar A, Abdeltawab NF, Fahmy A, Amin MA.** 2016. Development of safe, effective and  
599 immunogenic vaccine candidate for diarrheagenic *Escherichia coli* main pathotypes in a mouse  
600 model. *BMC Res Notes* **9**:80.
- 601
- 602 50. **Kim YJ, Yeo SG, Park JH, Ko HJ.** 2014. *Shigella* vaccine development: prospective animal  
603 models and current status. *Curr Pharm Biotechnol* **14**:903-912.
- 604
- 605 51. **Finlay BB, Brumell JH.** 2000. Salmonella interactions with host cells: in vitro to in vivo. *Philos*  
606 *Trans R Soc Lond B Biol Sci* **355**:623-631.
- 607
- 608 52. **Hahn WC.** 2002. immortalization and transformation of human cells. *Mol Cells* **13**:351-361.
- 609
- 610 53. **Noben M, Vanhove W, Arnauts K, Santo Ramalho A, Van Assche G, Vermeire S, Verfaillie**  
611 **C, Ferrante M.** 2017. Human intestinal epithelium in a dish: Current models for research into  
612 gastrointestinal pathophysiology. *United European Gastroenterol J* **5**:1073-1081.
- 613
- 614 54. **Koestler BJ, Ward CM, Fisher CR, Rajan A, Maresso AW, Payne SM.** 2019. Human  
615 Intestinal Enteroids as a Model System of *Shigella* Pathogenesis. *Infect Immun* **87**.
- 616
- 617 55. **Ranganathan S, Doucet M, Grassel CL, Delaine-Elias B, Zachos NC, Barry EM.** 2019.  
618 Evaluating *Shigella flexneri* Pathogenesis in the Human Enteroid Model. *Infect Immun* **87**.
- 619
- 620 56. **Gonyar LA, Smith RM, Giron JA, Zachos NC, Ruiz-Perez F, Nataro JP.** 2020. Aggregative  
621 Adherence Fimbriae II of Enteropathogenic *Escherichia coli* Are Required for Adherence and  
622 Barrier Disruption during Infection of Human Colonoids. *Infect Immun* **88**.



57. **Liu L, Saitz-Rojas W, Smith R, Gonyar L, In JG, Kovbasnjuk O, Zachos NC, Donowitz M, Nataro JP, Ruiz-Perez F.** 2020. Mucus layer modeling of human colonoids during infection with enteroaggregative *E. coli*. *Sci Rep* **10**:10533.
58. **Verma S, Prescott RA, Ingano L, Nickerson KP, Hill E, Faherty CS, Fasano A, Senger S, Cherayil BJ.** 2020. The YrbE phospholipid transporter of *Salmonella enterica* serovar Typhi regulates the expression of flagellin and influences motility, adhesion and induction of epithelial inflammatory responses. *Gut Microbes* **11**:526-538.
59. **Honer zu Bentrup K, Ramamurthy R, Ott CM, Emami K, Nelman-Gonzalez M, Wilson JW, Richter EG, Goodwin TJ, Alexander JS, Pierson DL, Pellis N, Buchanan KL, Nickerson CA.** 2006. Three-dimensional organotypic models of human colonic epithelium to study the early stages of enteric salmonellosis. *Microbes Infect* **8**:1813-1825.
60. **Salerno-Goncalves R, Fasano A, Sztein MB.** 2016. Development of a Multicellular Three-dimensional Organotypic Model of the Human Intestinal Mucosa Grown Under Microgravity. *J Vis Exp* doi:10.3791/54148.
61. **Salerno-Goncalves R, Fasano A, Sztein MB.** 2011. Engineering of a multicellular organotypic model of the human intestinal mucosa. *Gastroenterology* **141**:e18-20.
62. **Heo I, Dutta D, Schaefer DA, Iakobachvili N, Artegiani B, Sachs N, Boonekamp KE, Bowden G, Hendrickx APA, Willems RJL, Peters PJ, Riggs MW, O'Connor R, Clevers H.** 2018. Modelling *Cryptosporidium* infection in human small intestinal and lung organoids. *Nat Microbiol* **3**:814-823.
63. **Karve SS, Pradhan S, Ward DV, Weiss AA.** 2017. Intestinal organoids model human responses to infection by commensal and Shiga toxin producing *Escherichia coli*. *PLoS One* **12**:e0178966.
64. **Co JY, Margalef-Catala M, Li X, Mah AT, Kuo CJ, Monack DM, Amieva MR.** 2019. Controlling Epithelial Polarity: A Human Enteroid Model for Host-Pathogen Interactions. *Cell Rep* **26**:2509-2520 e2504.
65. **Fiorentino M, Levine MM, Sztein MB, Fasano A.** 2014. Effect of wild-type *Shigella* species and attenuated *Shigella* vaccine candidates on small intestinal barrier function, antigen trafficking, and cytokine release. *PLoS One* **9**:e85211.
66. **Fiorentino M, Lammers KM, Levine MM, Sztein MB, Fasano A.** 2013. In vitro Intestinal Mucosal Epithelial Responses to Wild-Type *Salmonella* Typhi and Attenuated Typhoid Vaccines. *Front Immunol* **4**:17.
67. **McCormick BA, Siber AM, Maurelli AT.** 1998. Requirement of the *Shigella flexneri* virulence plasmid in the ability to induce trafficking of neutrophils across polarized monolayers of the intestinal epithelium. *Infect Immun* **66**:4237-4243.

68. **Hale TL, Formal SB.** 1981. Protein synthesis in HeLa or Henle 407 cells infected with *Shigella dysenteriae* 1, *Shigella flexneri* 2a, or *Salmonella typhimurium* W118. *Infect Immun* **32**:137-144.
69. **Emanuele AA, Adams NE, Chen YC, Maurelli AT, Garcia GA.** 2014. Potential novel antibiotics from HTS targeting the virulence-regulating transcription factor, VirF, from *Shigella flexneri*. *J Antibiot (Tokyo)* **67**:379-386.
70. **Sen A, Leon MA, Palchaudhuri S.** 1990. Comparative study of attachment to and invasion of epithelial cell lines by *Shigella dysenteriae*. *Infect Immun* **58**:2401-2403.
71. **Freire R, Ingano L, Serena G, Cetinbas M, Anselmo A, Sapone A, Sadreyev RI, Fasano A, Senger S.** 2019. Human gut derived-organoids provide model to study gluten response and effects of microbiota-derived molecules in celiac disease. *Sci Rep* **9**:7029.
72. **Rajan A, Robertson MJ, Carter HE, Poole NM, Clark JR, Green SI, Criss ZK, Zhao B, Karandikar U, Xing Y, Margalef-Catala M, Jain N, Wilson RL, Bai F, Hyser JM, Petrosino J, Shroyer NF, Blutt SE, Coarfa C, Song X, Prasad BV, Amieva MR, Grande-Allen J, Estes MK, Okhuysen PC, Maresso AW.** 2020. Enteroaggregative *E. coli* Adherence to Human Heparan Sulfate Proteoglycans Drives Segment and Host Specific Responses to Infection. *PLoS Pathog* **16**:e1008851.
73. **Vanuytsel T, Senger S, Fasano A, Shea-Donohue T.** 2013. Major signaling pathways in intestinal stem cells. *Biochim Biophys Acta* **1830**:2410-2426.
74. **de Lau W, Kujala P, Schneeberger K, Middendorp S, Li VS, Barker N, Martens A, Hofhuis F, DeKoter RP, Peters PJ, Nieuwenhuis E, Clevers H.** 2012. Peyer's patch M cells derived from Lgr5(+) stem cells require SpiB and are induced by RankL in cultured "miniguts". *Mol Cell Biol* **32**:3639-3647.
75. **Rouch JD, Scott A, Lei NY, Solorzano-Vargas RS, Wang J, Hanson EM, Kobayashi M, Lewis M, Stelzner MG, Dunn JC, Eckmann L, Martin MG.** 2016. Development of Functional Microfold (M) Cells from Intestinal Stem Cells in Primary Human Enteroids. *PLoS One* **11**:e0148216.
76. **Kohler H, Rodrigues SP, McCormick BA.** 2002. *Shigella flexneri* Interactions with the Basolateral Membrane Domain of Polarized Model Intestinal Epithelium: Role of Lipopolysaccharide in Cell Invasion and in Activation of the Mitogen-Activated Protein Kinase ERK. *Infect Immun* **70**:1150-1158.
77. **Weinstein DL, O'Neill BL, Hone DM, Metcalf ES.** 1998. Differential early interactions between *Salmonella enterica* serovar Typhi and two other pathogenic *Salmonella* serovars with intestinal epithelial cells. *Infect Immun* **66**:2310-2318.
78. **Popoff MY.** 1991. [Virulence factors of *Salmonella*: from molecular genetics to diagnostic applications]. *Bull Acad Natl Med* **175**:811-821.

79. **Rout WR, Formal SB, Dammin GJ, Giannella RA.** 1974. Pathophysiology of Salmonella diarrhea in the Rhesus monkey: Intestinal transport, morphological and bacteriological studies. *Gastroenterology* **67**:59-70.
80. **Giannella RA, Formal SB, Dammin GJ, Collins H.** 1973. Pathogenesis of salmonellosis. Studies of fluid secretion, mucosal invasion, and morphologic reaction in the rabbit ileum. *J Clin Invest* **52**:441-453.
81. **Parry CM, Hien TT, Dougan G, White NJ, Farrar JJ.** 2002. Typhoid fever. *N Engl J Med* **347**:1770-1782.
82. **Tran QT, Gomez G, Khare S, Lawhon SD, Raffatellu M, Baumler AJ, Ajithdoss D, Dhavala S, Adams LG.** 2010. The Salmonella enterica serotype Typhi Vi capsular antigen is expressed after the bacterium enters the ileal mucosa. *Infect Immun* **78**:527-535.
83. **Lee JH, Kim JJ, Jung JH, Lee SY, Bae MH, Kim YH, Son HJ, Rhee PL, Rhee JC.** 2004. Colonoscopic manifestations of typhoid fever with lower gastrointestinal bleeding. *Dig Liver Dis* **36**:141-146.
84. **Bos WT, Willemsen PJ.** 2002. Perforation due to ileocaecal salmonellosis. *Acta Chir Belg* **102**:348-350.
85. **Bhatti JM, Memon Y, Sarfaraz S, Salahuddin N.** 2019. An Unusual Case of Extensively Drug Resistant Typhoid Fever. *Cureus* **11**:e4664.
86. **Sabbagh SC, Forest CG, Lepage C, Leclerc JM, Daigle F.** 2010. So similar, yet so different: uncovering distinctive features in the genomes of Salmonella enterica serovars Typhimurium and Typhi. *FEMS Microbiol Lett* **305**:1-13.
87. **Barker N, van Es JH, Kuipers J, Kujala P, van den Born M, Cozijnsen M, Haegebarth A, Korving J, Begthel H, Peters PJ, Clevers H.** 2007. Identification of stem cells in small intestine and colon by marker gene Lgr5. *Nature* **449**:1003-1007.
88. **VanDussen KL, Sonnek NM, Stappenbeck TS.** 2019. L-WRN conditioned medium for gastrointestinal epithelial stem cell culture shows replicable batch-to-batch activity levels across multiple research teams. *Stem Cell Res* **37**:101430.
89. **Liu R, Li H, Cai J, Wei Q, Han X.** 2019. Lgr5(+) intestinal stem cell sorting and organoid culture. *Animal Model Exp Med* **2**:132-135.
90. **Watson CL, Mahe MM, Munera J, Howell JC, Sundaram N, Poling HM, Schweitzer JJ, Vallance JE, Mayhew CN, Sun Y, Grabowski G, Finkbeiner SR, Spence JR, Shroyer NF, Wells JM, Helmuth MA.** 2014. An in vivo model of human small intestine using pluripotent stem cells. *Nat Med* **20**:1310-1314.
91. **Kim YS, Ho SB.** 2010. Intestinal goblet cells and mucins in health and disease: recent insights and progress. *Curr Gastroenterol Rep* **12**:319-330.



- 765 92. **Chang-Graham AL, Danhof HA, Engevik MA, Tomaro-Duchesneau C, Karandikar UC,**  
766 **Estes MK, Versalovic J, Britton RA, Hyser JM.** 2019. Human Intestinal Enteroids With  
767 Inducible Neurogenin-3 Expression as a Novel Model of Gut Hormone Secretion. *Cell Mol*  
768 *Gastroenterol Hepatol* **8**:209-229.
- 769
- 770 93. **Li HJ, Ray SK, Singh NK, Johnston B, Leiter AB.** 2011. Basic helix-loop-helix transcription  
771 factors and enteroendocrine cell differentiation. *Diabetes Obes Metab* **13 Suppl 1**:5-12.  
772
- 773 94. **Furuse M, Hirase T, Itoh M, Nagafuchi A, Yonemura S, Tsukita S, Tsukita S.** 1993.  
774 Occludin: a novel integral membrane protein localizing at tight junctions. *J Cell Biol* **123**:1777-  
775 1788.  
776
- 777 95. **Harrer A, Bucker R, Boehm M, Zarzecka U, Tegtmeier N, Sticht H, Schulzke JD, Backert**  
778 **S.** 2019. *Campylobacter jejuni* enters gut epithelial cells and impairs intestinal barrier function  
779 through cleavage of occludin by serine protease HtrA. *Gut Pathog* **11**:4.  
780
- 781 96. **Stappenbeck TS.** 2009. Paneth cell development, differentiation, and function: new molecular  
782 cues. *Gastroenterology* **137**:30-33.  
783
- 784 97. **Bastide P, Darido C, Pannequin J, Kist R, Robine S, Marty-Double C, Bibeau F, Scherer**  
785 **G, Joubert D, Hollande F, Blache P, Jay P.** 2007. Sox9 regulates cell proliferation and is  
786 required for Paneth cell differentiation in the intestinal epithelium. *J Cell Biol* **178**:635-648.  
787
- 788 98. **Gregorieff A, Stange DE, Kujala P, Begthel H, van den Born M, Korving J, Peters PJ,**  
789 **Clevers H.** 2009. The ets-domain transcription factor Spdef promotes maturation of goblet and  
790 paneth cells in the intestinal epithelium. *Gastroenterology* **137**:1333-1345 e1331-1333.  
791
- 792 99. **Peeters T, Vantrappen G.** 1975. The Paneth cell: a source of intestinal lysozyme. *Gut* **16**:553-  
793 558.  
794
- 795 100. **Porter EM, Bevins CL, Ghosh D, Ganz T.** 2002. The multifaceted Paneth cell. *Cell Mol Life*  
796 *Sci* **59**:156-170.  
797
- 798 101. **Faherty CS, Wu T, Morris CR, Grassel CL, Rasko DA, Harper JM, Shea-Donohue T,**  
799 **Fasano A, Barry EM.** 2016. The synthesis of OspD3 (ShET2) in *Shigella flexneri* is independent  
800 of OspC1. *Gut Microbes* **7**:486-502.  
801
- 802 102. **Santos PS, Caria CRP, Gotardo EMF, Ribeiro ML, Pedrazzoli J, Gambero A.** 2018.  
803 Artificial sweetener saccharin disrupts intestinal epithelial cells' barrier function in vitro. *Food*  
804 *Funct* **9**:3815-3822.  
805
- 806 103. **Ozawa T, Takayama K, Okamoto R, Negoro R, Sakurai F, Tachibana M, Kawabata K,**  
807 **Mizuguchi H.** 2015. Generation of enterocyte-like cells from human induced pluripotent stem  
808 cells for drug absorption and metabolism studies in human small intestine. *Sci Rep* **5**:16479.  
809
- 810 104. **Kowapradit J, Opanasopit P, Ngawhirunpat T, Rojanarata T, Ruktanonchai U, Sajomsang**  
811 **W.** 2010. Methylated N-(4-N,N-dimethylaminocinnamyl) chitosan enhances paracellular  
812 permeability across Caco-2 cells. *Drug Deliv* **17**:301-312.  
813

105. **Man AL, Bertelli E, Rentini S, Regoli M, Briars G, Marini M, Watson AJ, Nicoletti C.** 2015. Age-associated modifications of intestinal permeability and innate immunity in human small intestine. *Clin Sci (Lond)* **129**:515-527.
106. **Takenaka T, Harada N, Kuze J, Chiba M, Iwao T, Matsunaga T.** 2014. Human small intestinal epithelial cells differentiated from adult intestinal stem cells as a novel system for predicting oral drug absorption in humans. *Drug Metab Dispos* **42**:1947-1954.
107. **Garcia J, Fernandez-Blanco A, Teixido M, Sanchez-Navarro M, Giralt E.** 2018. d-Polyarginine Lipopeptides as Intestinal Permeation Enhancers. *ChemMedChem* **13**:2045-2052.
108. **Yu H, Ding X, Shang L, Zeng X, Liu H, Li N, Huang S, Wang Y, Wang G, Cai S, Chen M, Levesque CL, Johnston LJ, Qiao S.** 2018. Protective Ability of Biogenic Antimicrobial Peptide Microcin J25 Against Enterotoxigenic Escherichia Coli-Induced Intestinal Epithelial Dysfunction and Inflammatory Responses IPEC-J2 Cells. *Front Cell Infect Microbiol* **8**:242.
109. **Wang J, Huang N, Xiong J, Wei H, Jiang S, Peng J.** 2018. Caprylic acid and nonanoic acid upregulate endogenous host defense peptides to enhance intestinal epithelial immunological barrier function via histone deacetylase inhibition. *Int Immunopharmacol* **65**:303-311.
110. **Kodama N, Iwao T, Katano T, Ohta K, Yuasa H, Matsunaga T.** 2016. Characteristic Analysis of Intestinal Transport in Enterocyte-Like Cells Differentiated from Human Induced Pluripotent Stem Cells. *Drug Metab Dispos* **44**:0.
111. **Kauffman AL, Gyurdieva AV, Mabus JR, Ferguson C, Yan Z, Hornby PJ.** 2013. Alternative functional in vitro models of human intestinal epithelia. *Front Pharmacol* **4**:79.
112. **Eaton AD, Zimmermann C, Delaney B, Hurley BP.** 2017. Primary human polarized small intestinal epithelial barriers respond differently to a hazardous and an innocuous protein. *Food Chem Toxicol* **106**:70-77.
113. **Chen HJ, Miller P, Shuler ML.** 2018. A pumpless body-on-a-chip model using a primary culture of human intestinal cells and a 3D culture of liver cells. *Lab Chip* **18**:2036-2046.

## Figure Legends

**Figure 1. Flow cytometry analyses identify an increase in SPIB<sup>+</sup> expression following RANKL treatment.** The increase in SPIB<sup>+</sup> expression, which is indicative of M cell expression, after 24 or 48 hours of RANKL treatment is represented as fold change of SPIB<sup>+</sup> cells in tissues treated with RANKL (either DAPT + RANKL 100ng/ml, red bars or DAPT + RANKL 500 ng/ml, blue bars) over the matching tissues treated only with DAPT (represented by the dotted line) for each tissue. Statistical

significance was determined by paired Friedman test for the DAPT + RANKL (100 or 500 ng/ml) differentiation compared to DAPT only-differentiation of the matched originating tissue (\*,  $p < 0.05$ ). A total of 4 biological replicate experiments were analyzed for the terminal ileum and cecum, and 6 biological replicates were analyzed for the ascending colon. For each biological sample, an entire 12-well plate was trypsinized, and the cells were pooled into one sample tube for staining and analysis.

**Figure 2. RT-qPCR analyses demonstrate significantly induced *SPIB* gene expression following RANKL treatment.** Gene expression for *SPIB*, *ESE1*, and *KLF4* was measured following 24-hour DAPT + 100 ng/ml RANKL or DAPT only treatment for the terminal ileum (TI, blue,  $n = 6$ ), cecum (red,  $n = 3$ ), and colon (green,  $n = 6$ ). Data are expressed as DAPT + RANKL fold change over the DAPT only treatment, shown as the average fold change  $\pm$  the SEM. All data were normalized to expression from the *18S* housekeeping gene. Statistical significance was determined with the Mann Whitney unpaired t-test of the dCt. Data were considered significant at a p-value  $< 0.05$  (\*  $< 0.05$ , \*\*  $< 0.01$ ). Please note the different y-axes for each graph.

**Figure 3. Transmission electron microscopy analysis of the HIODEM models.** Mature monolayers derived from the terminal ileum (top), cecum (middle), or colon (bottom) were evaluated by TEM to visualize the cell types present, monolayer quality, and barrier formation. All models displayed characteristic features of enterocytes (E), goblet cells (G), and M cells (M). For the colon, differentiation treatments with DAPT and DAPT + RANKL were compared to visualize the presence of M cells. Magnifications range from 5,000X to 25,000X and the corresponding scale bars are provided.

**Figure 4. *Shigella* infection analysis reveals a tissue tropism for the colon.** Infection analyses were performed with at least three biological replicates, in which three technical replicates were present for each experiment. Imaging analysis was performed on biological or technical independent samples

relative to the plotted infection data. For plotted data, please note the different y-axis scales. Statistical significance was determined by the Student's t-test of the indicated comparisons, in which \* =  $p < 0.05$ , \*\* =  $p < 0.01$ , \*\*\* =  $p < 0.001$ .

**A.** Ileum-, cecum-, and colon-derived HIODEM models were infected with *S. flexneri* strain 2457T and the percent of the inoculum adherent to the monolayer surface was determined. *S. flexneri* was adherent to all three tissue locations with a significant increase in adherence to the cecum- and colon-derived HIODEMs relative to ileum-derived HIODEMs. Statistical analyses compared the ileum adherence rates to the cecum or colon.

**B.** *S. flexneri* invasion analysis of the HIODEM models. Colon-derived HIODEMs differentiated with DAPT and RANKL had nearly three times as many intracellular *S. flexneri* strain 2457T in colonic RANKL-treated HIODEMs. Statistical analyses compared the DAPT-treated monolayers relative to the two DAPT + RANKL treatments for each set of models (ileum, cecum, and colon). The non-invasive strain BS103 did not have significant recovery titers following gentamicin treatment in the cecum or colon HIODEMs despite M cell differentiation, which validated the invasion data for 2457T.

**C.** SEM of colon-derived HIODEMs differentiated with DAPT + RANKL at either 100 ng/ml or 500 ng/ml concentrations. Bacterial adherence to both enterocytes and M cells, with cell surfaces lacking microvilli, were observed. Magnification ranged from 5,000X to 7,000X, with 2  $\mu$ m and 1  $\mu$ m scale bars, respectively. Enlarged portion of the images are denoted by the white boxes, arrows point to areas of various stages of bacterial translocation on the surface of the M cells. Please note that not all areas are highlighted.

**D.** Transmission electron micrographs of DAPT and DAPT + RANKL-differentiated colonic monolayers infected with *S. flexneri* reveal bacterial association with the apical surface of enterocytes (E) and M cells (M). Areas with bacterial cells at the cellular surface or translocating through M cells are highlighted by the arrows. Magnification for all images is 50,000X with 500 nm scale bars noted.

**Figure 5. The HIODEM model demonstrates *Salmonella* serovar-specific infection patterns.**

Infection analyses were performed with at least three biological replicates, in which three technical replicates were present for each experiment. Imaging analysis was performed on biological or technical independent samples relative to the plotted infection data. For plotted data, please note the different y-axis scales. Statistical significance was determined by the Student's t-test of the indicated comparisons, in which \* =  $p < 0.05$ , \*\* =  $p < 0.01$ .

**A.** *Salmonella enteric* serovar Typhi strain Ty2 adhered to ileum-, cecum-, and colon-derived HIODEMs, with the greatest rate detected in the cecum monolayers. Invasion was prevalent in the ileum- and cecum-derived HIODEMs, with a modest increase in the cecum monolayers.

**B.** RANKL-treatment of the ileum HIODEMs did not result in significant differences in the rate of invasion.

**C.** TEM analysis of *S. Typhi* invasion in the ileum HIODEMs. Magnification ranged from 10,000X to 25,000X, with 2  $\mu\text{m}$  and 500 nm scale bars, respectively. Arrows point to bacteria, please note that not all bacterial are highlighted.

**D.** *Salmonella enterica* serovar Typhimurium strain SL1344 (STM) preferentially invades ileum HIODEMs at significantly higher rates relative to *S. Typhi* (STY).

**E.** Scanning electron micrographs of STM-, or STY-infected ileum HIODEMs. STM infection is accompanied by cell rounding and barrier destruction, whereas STY infection maintains barrier function and showed bacterial association with the microvilli of enterocytes. Magnifications range from 7,000X to 14,000X, with 2  $\mu\text{m}$  scale bars highlighted for each image. Please refer to Supplemental Figure S3 for additional images.

**Figure 6. HIODEM supports infection with different *Escherichia coli* pathovars.**

**A.** Enteroaggregative (EAEC strain 042), enterohemorrhagic (EHEC 0157:H7 strain 933) and enteropathogenic (EPEC strain 2348/69) *E. coli* adhere to the surface of HIODEMs without significant

930 invasion detected. Colon-derived HIODEMs was used for EHEC and EAEC, while ileum-derived  
931 HIODEMs were used for EPEC.

932 **B.** Three dimensional (3D) confocal reconstructions of ileum HIODEM immunostained for actin (green),  
933 EPEC (red), and nuclei (blue) show recruitment of actin to the base of adherent bacteria in ileum-derived  
934 HIODEM. Magnification of the full image is 40X, with the height and width of the viewing plane at  
935 141.3  $\mu\text{m}$  and the depth at 19.6  $\mu\text{m}$ .

936 **C.** SEM of EPEC and EAEC infected monolayers demonstrate bacterial association with the host cells,  
937 aggregation of bacteria, and clusters of bacteria embedded in mucus. Magnifications range from 2,000X  
938 to 10,000X, with 10  $\mu\text{m}$  and 2  $\mu\text{m}$  scale bars, respectively. Ileum-derived HIODEM was used for EPEC  
939 and colon-derived HIODEM was used for EAEC.

940 **D.** TEM images of infecting EPEC, EHEC and EAEC. Magnifications range from 50,000X to 60,000X  
941 with 500 nm scale bars indicated. White arrows indicate pedestal formation for EPEC and EHEC. Ileum-  
942 derived HIODEM was used for EPEC and colon-derived HIODEMs were used for EHEC and EAEC.

## 944 **Supplemental Files**

945 **Supplemental Figure S1. Additional flow cytometry data.** The percentage of each cell type  
946 (enterocytes (ESE1), goblet cells (KLF4), and M cells (SPIB)) detected by flow cytometry for the  
947 terminal ileum, cecum, and colon. The data represent the average percentage  $\pm$  SEM of each cell  
948 population at 24- and 48-hours following differentiation, in which treatments included apical DAPT  
949 (black bars), or a combination of apical DAPT with basolateral physiological 100 ng/ml RANKL  
950 treatment (red bars) and supraphysiological 500ng/mL (blue bars). Statistical significance was  
951 determined with a one-way ANOVA (paired Friedman test) for the samples treated with RANKL versus  
952 the DAPT only treatment of the matched originating tissue (\* =  $p < 0.05$ ). Please note that the SPIB data  
953 corresponds to the data presented in Figure 1.

954

955 **Supplemental Figure S2. Additional analysis of *Shigella flexneri* HIODEM infection.**

956 **A.** Colon-derived HIODEM monolayers were treated with DAPT + RANKL. Uninfected monolayers  
957 (media) or infected with *S. flexneri* demonstrate significant secretion of IL-8 after infection. Statistical  
958 significance was determined by the Student's t-test, \* =  $p \leq 0.05$ .

959 **B.** No significant increase in cell death as evaluated by LDH-release was detected following infection of  
960 colon-derived HIODEM monolayers treated with DAPT + RANKL.

961

962 **Supplemental Figure S3. Additional microscopy analysis of *Salmonella* HIODEM infection.**

963 **A.** Confocal immunofluorescence analysis of *S. Typhi* HIODEM infection. Images of control (left) or *S.*  
964 *Typhi* infection (right) of ileum-derived HIODEM. Samples were stained with DAPI to visualize cellular  
965 DNA (blue),  $\alpha$ -Muc2 to identify the mucus barrier secreted from goblet cells (green) and  $\alpha$ -*Salmonella*  
966 to visualize the infecting population (red). Colocalization of *Salmonella* and DAPI results in the bacteria  
967 appearing purple.

968 **B.** Scanning electron micrographs of STM-, or STY-infected ileum HIODEMs. As demonstrated in  
969 Figure 5, STM infection led to significant destruction of the barrier, while STY infection did not affect  
970 the barrier and the bacteria associated with microvilli on the apical surface of the enterocytes. 2  $\mu$ m scale  
971 bars are indicated.

972 **Supplemental Methods.** Expanded methodology for culturing organoids and plating, differentiating,  
973 and infecting the monolayers with *Shigella*, *Salmonella*, or the different *E. coli* pathovars.



974 **Table 1. Average TEER values from this study and reported in the literature.**

| Cell type/Tissue          | Origin                                 | Support | TEER Value ( $\Omega \cdot \text{cm}^2$ +/-SEM) | Reference  |
|---------------------------|----------------------------------------|---------|-------------------------------------------------|------------|
| Biopsy ileum              | terminal ileum                         | TW      | 1010 +/- 112                                    | This study |
| Biopsy cecum              | cecum                                  | TW      | 490 +/- 31                                      | This study |
| Biopsy colon              | ascending colon                        | TW      | 209 +/- 2.7                                     | This study |
| Caco-2*                   | colorectal adenocarcinoma              | TW      | 400                                             | (102)      |
| Caco-2                    |                                        | TW      | 400                                             | (103)      |
| Caco-2                    |                                        | TW      | 600                                             | (104)      |
| Caco-2                    |                                        | TW      | 1000                                            | (105)      |
| Caco-2                    |                                        | TW      | 900±23                                          | (106)      |
| Caco-2/HT-29*             | Co-culture model                       | TW      | 300-400                                         | (107)      |
| IPEC-J2*                  | porcine jejunum                        | TW      | 1500                                            | (108)      |
| IPEC-J2                   |                                        | TW      | 1000-5000                                       | (109)      |
| hiPS-ELC                  | human embryonic pluripotent stem cells | TW      | 250                                             | (103)      |
| hiPS-ELC                  |                                        | TW      | 100                                             | (110)      |
| hiPS-ELC                  |                                        | TW      | 900                                             | (111)      |
| hInEpCs                   | small intestine                        | TW      | 1500                                            | (111)      |
| hInEpCs                   | small intestine                        | TW      | 400                                             | (112)      |
| FEnS/AEnS                 | fetal intestines and adult duodenum    | TW      | 400-600                                         | (15)       |
| AEnS                      | duodenum                               | TW      | 600-1000                                        | (71)       |
| hIECs/colonic fibroblasts | colon                                  | TW      | 250                                             | (113)      |
| hiPS- ileal ELC           | ileal                                  | TW      | 400                                             | (11)       |
| hiPS-rectal ELC           | rectal                                 | TW      | 395                                             | (11)       |
| hIECS                     | small intestine                        | TW      | 98.9±17.5                                       | (106)      |

975

976 Abbreviations: IPEC = intestinal porcine enterocyte cells, hiPS = human induced pluripotent stem cells, ELC=

977 enterocyte-like cells, hInEpCs = human primary intestinal epithelial cells (commercially available), FEnS = fetal-

978 derived enterospheres, AEnS = adult-derived enterospheres, hIEC = human intestinal epithelial cell, TW =

979 transwell, Ussing = Ussing chambers. \* = cell lines.

980



981 **Table 2. Gene expression analyzed by RT-qPCR in models treated with 100 ng/ml RANK +**  
 982 **DAPT for 24 hours.**

| <b>Gene<sup>a</sup></b> | <b>Terminal Ileum</b>        |                                   | <b>Cecum</b>     |                       | <b>Colon</b>     |                       |
|-------------------------|------------------------------|-----------------------------------|------------------|-----------------------|------------------|-----------------------|
|                         | <b><u>FC<sup>b</sup></u></b> | <b><u>p-value<sup>c</sup></u></b> | <b><u>FC</u></b> | <b><u>p-value</u></b> | <b><u>FC</u></b> | <b><u>p-value</u></b> |
| <i>LRG5</i>             | 1.1                          | ns                                | 4.7              | ns                    | 0.4              | <0.005                |
| <i>SPIB</i>             | 213.9                        | <0.005                            | 8.7              | ns                    | 14625.1          | <0.005                |
| <i>KLF4</i>             | 0.7                          | ns                                | 0.6              | ns                    | 0.8              | ns                    |
| <i>ESE1</i>             | 0.9                          | ns                                | 0.4              | ns                    | 0.7              | <0.05                 |
| <i>MUC2</i>             | 2.6                          | ns                                | 0.2              | ns                    | 1.2              | ns                    |
| <i>CGA</i>              | 0.3                          | ns                                | 0.5              | ns                    | 1.7              | ns                    |
| <i>NEUROD</i>           | bdl                          | --                                | bdl              | --                    | 1.2              | ns                    |
| <i>SPDEF</i>            | 0.8                          | ns                                | 0.4              | ns                    | 0.3              | <0.005                |
| <i>SOX9</i>             | 1.2                          | ns                                | 0.3              | ns                    | 1.3              | <0.05                 |
| <i>LYZ</i>              | 1.1                          | ns                                | 0.2              | ns                    | 0.6              | <0.005                |
| <i>OCLDN</i>            | 1.2                          | ns                                | 0.4              | ns                    | 1.1              | ns                    |
| <i>SIM</i>              | 1.1                          | ns                                | 0.2              | ns                    | 1.0              | ns                    |

983

984 <sup>a</sup> Please refer to the Materials and Methods for information on each gene.

985 <sup>b</sup> Fold change (FC) reflects the fold change in gene expression in the 100 ng/ml RANKL +  
 986 DAPT treatments relative to the DAPT treatment at 24 hours. BDL = below detection level.  
 987 Please note that the *SPIB* expression levels correspond to the data presented in Figure 2.

988 <sup>c</sup> Statistical significance determined with the non-parametric Mann-Whitney test. NS = not  
 989 significant.

# Figure 1

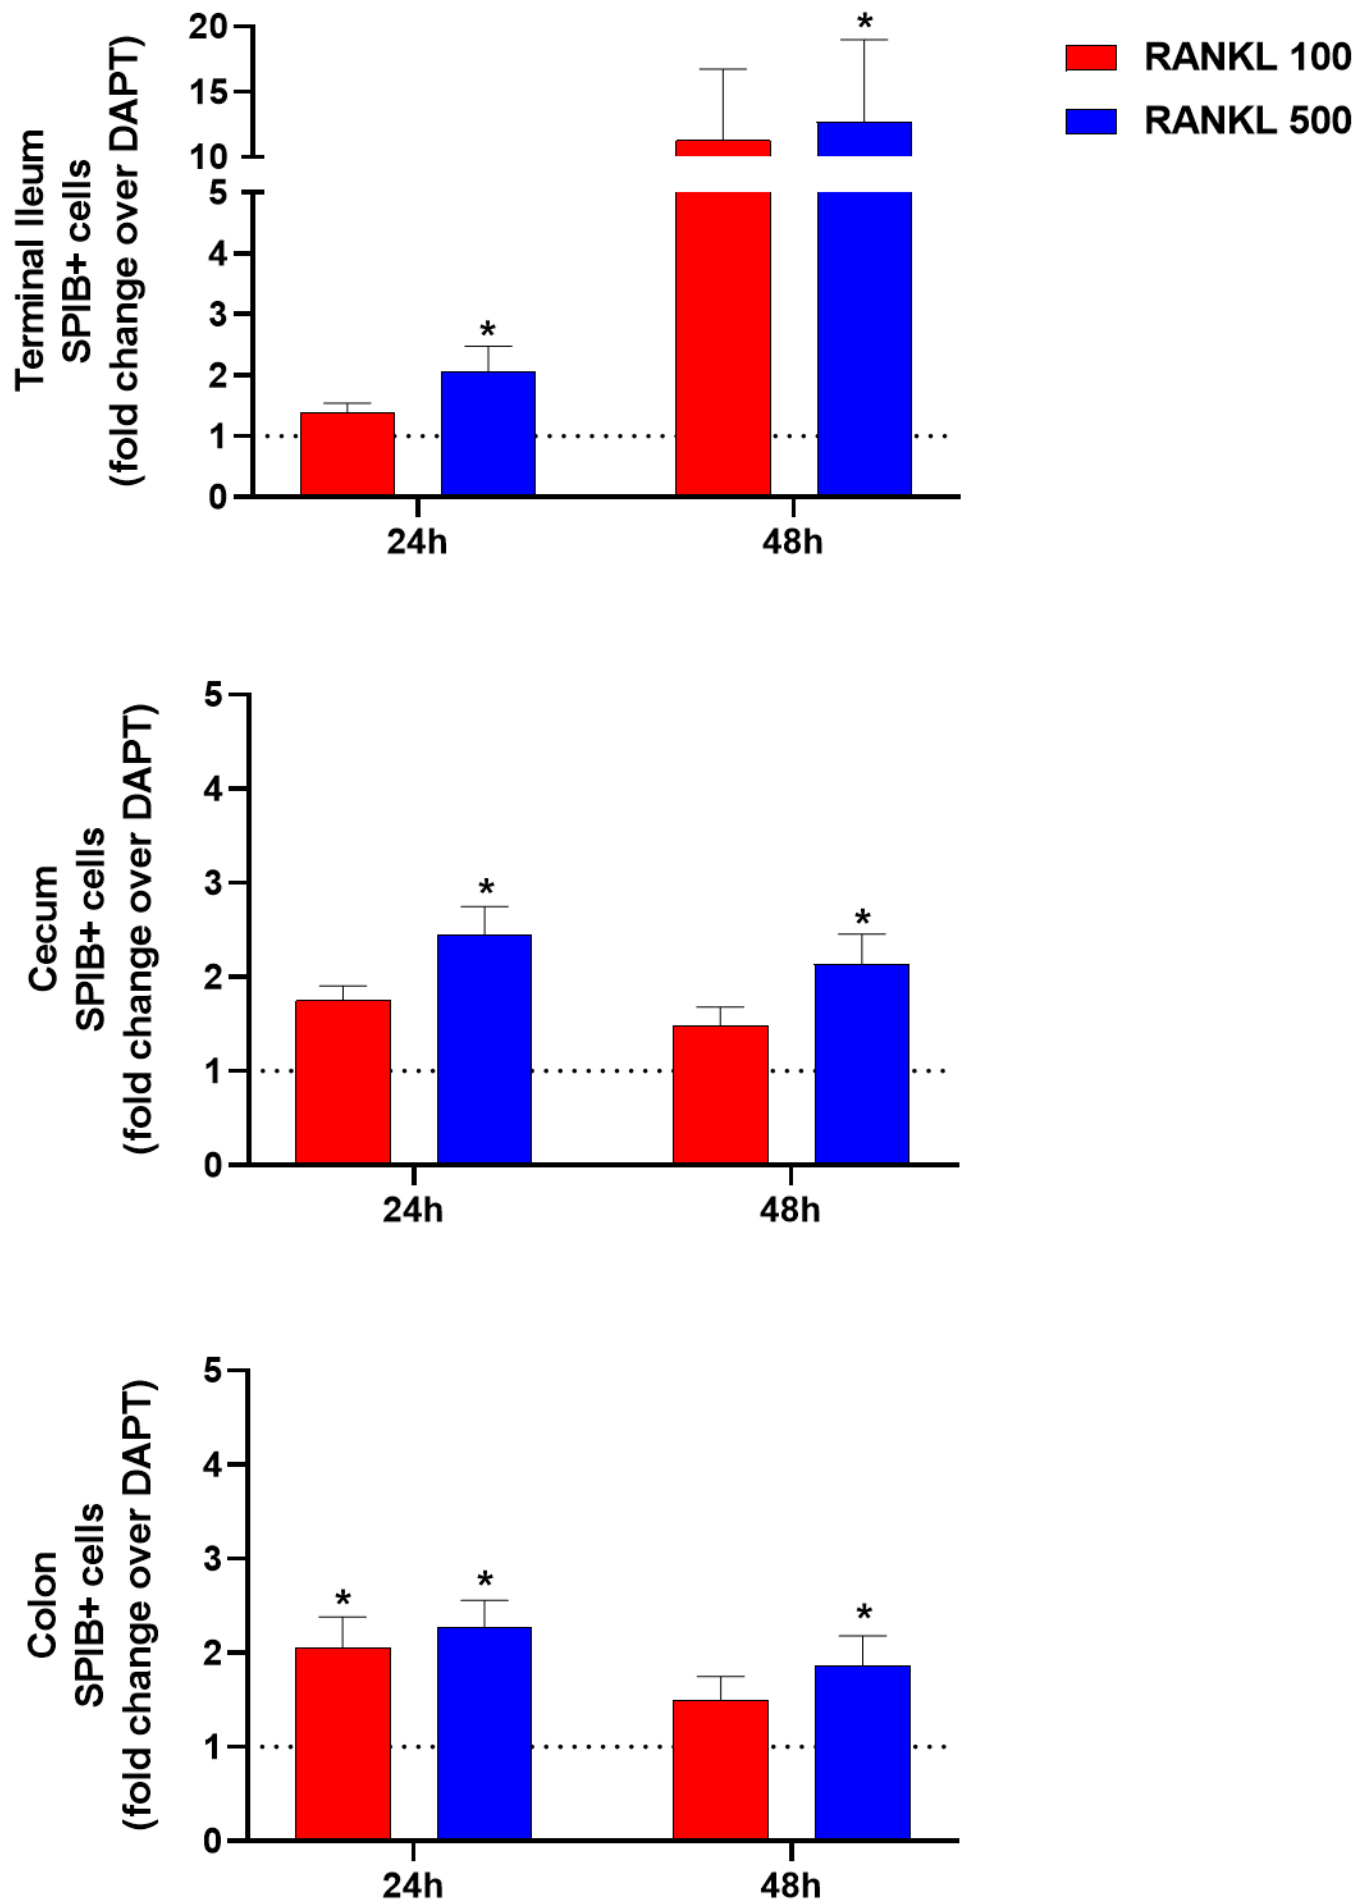

Figure 2

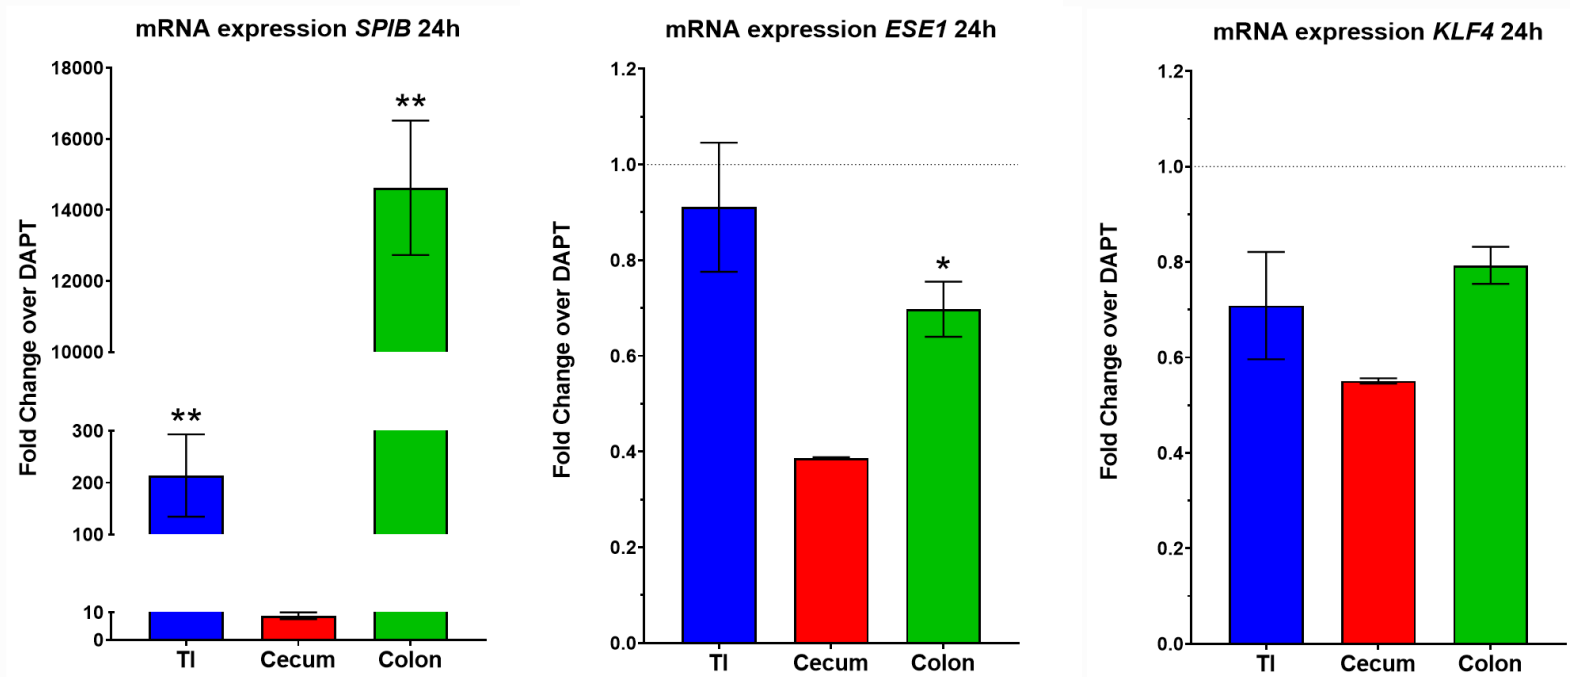

**Figure 3**

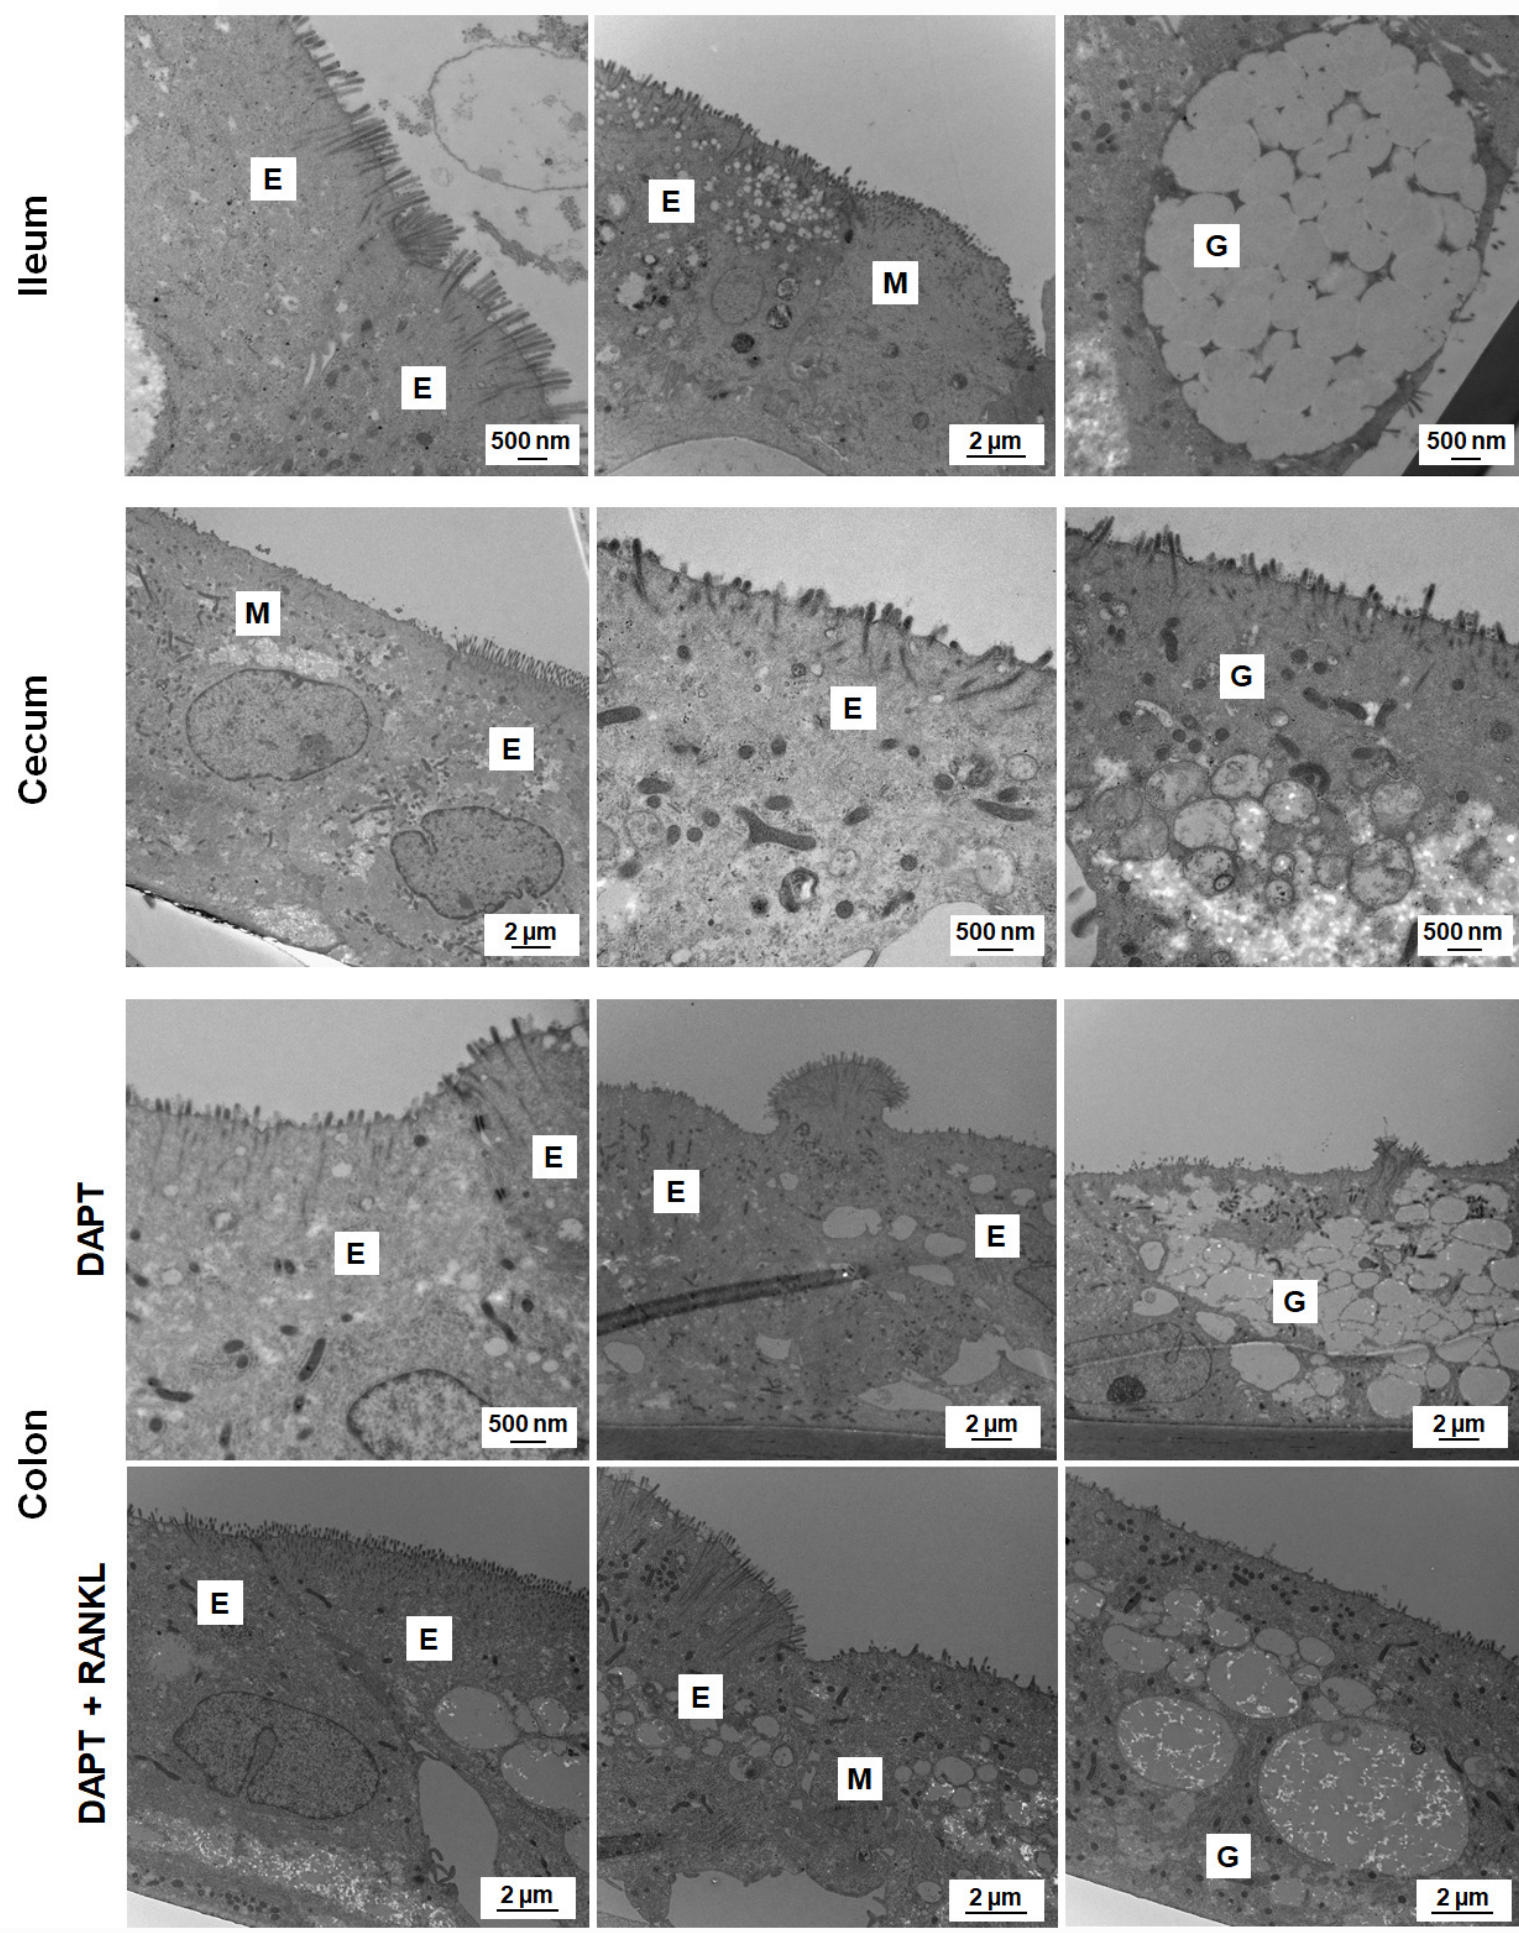



Figure 4

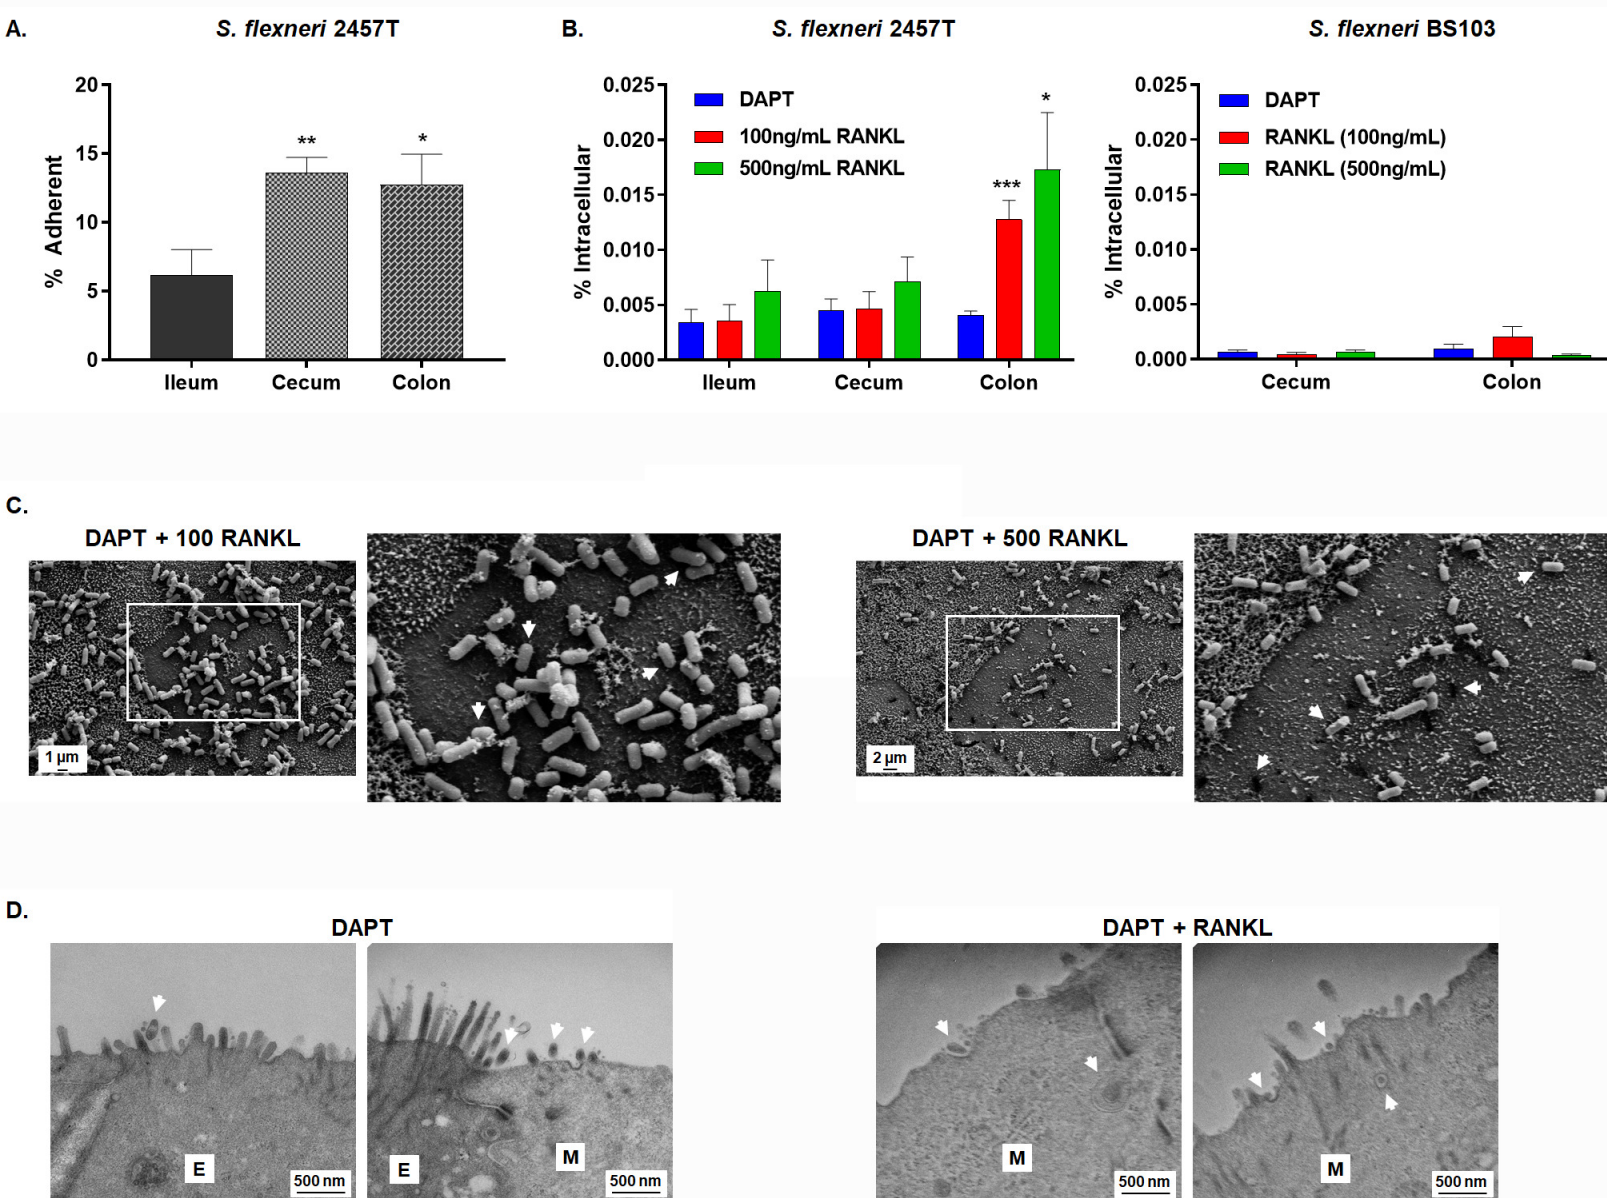

Figure 5

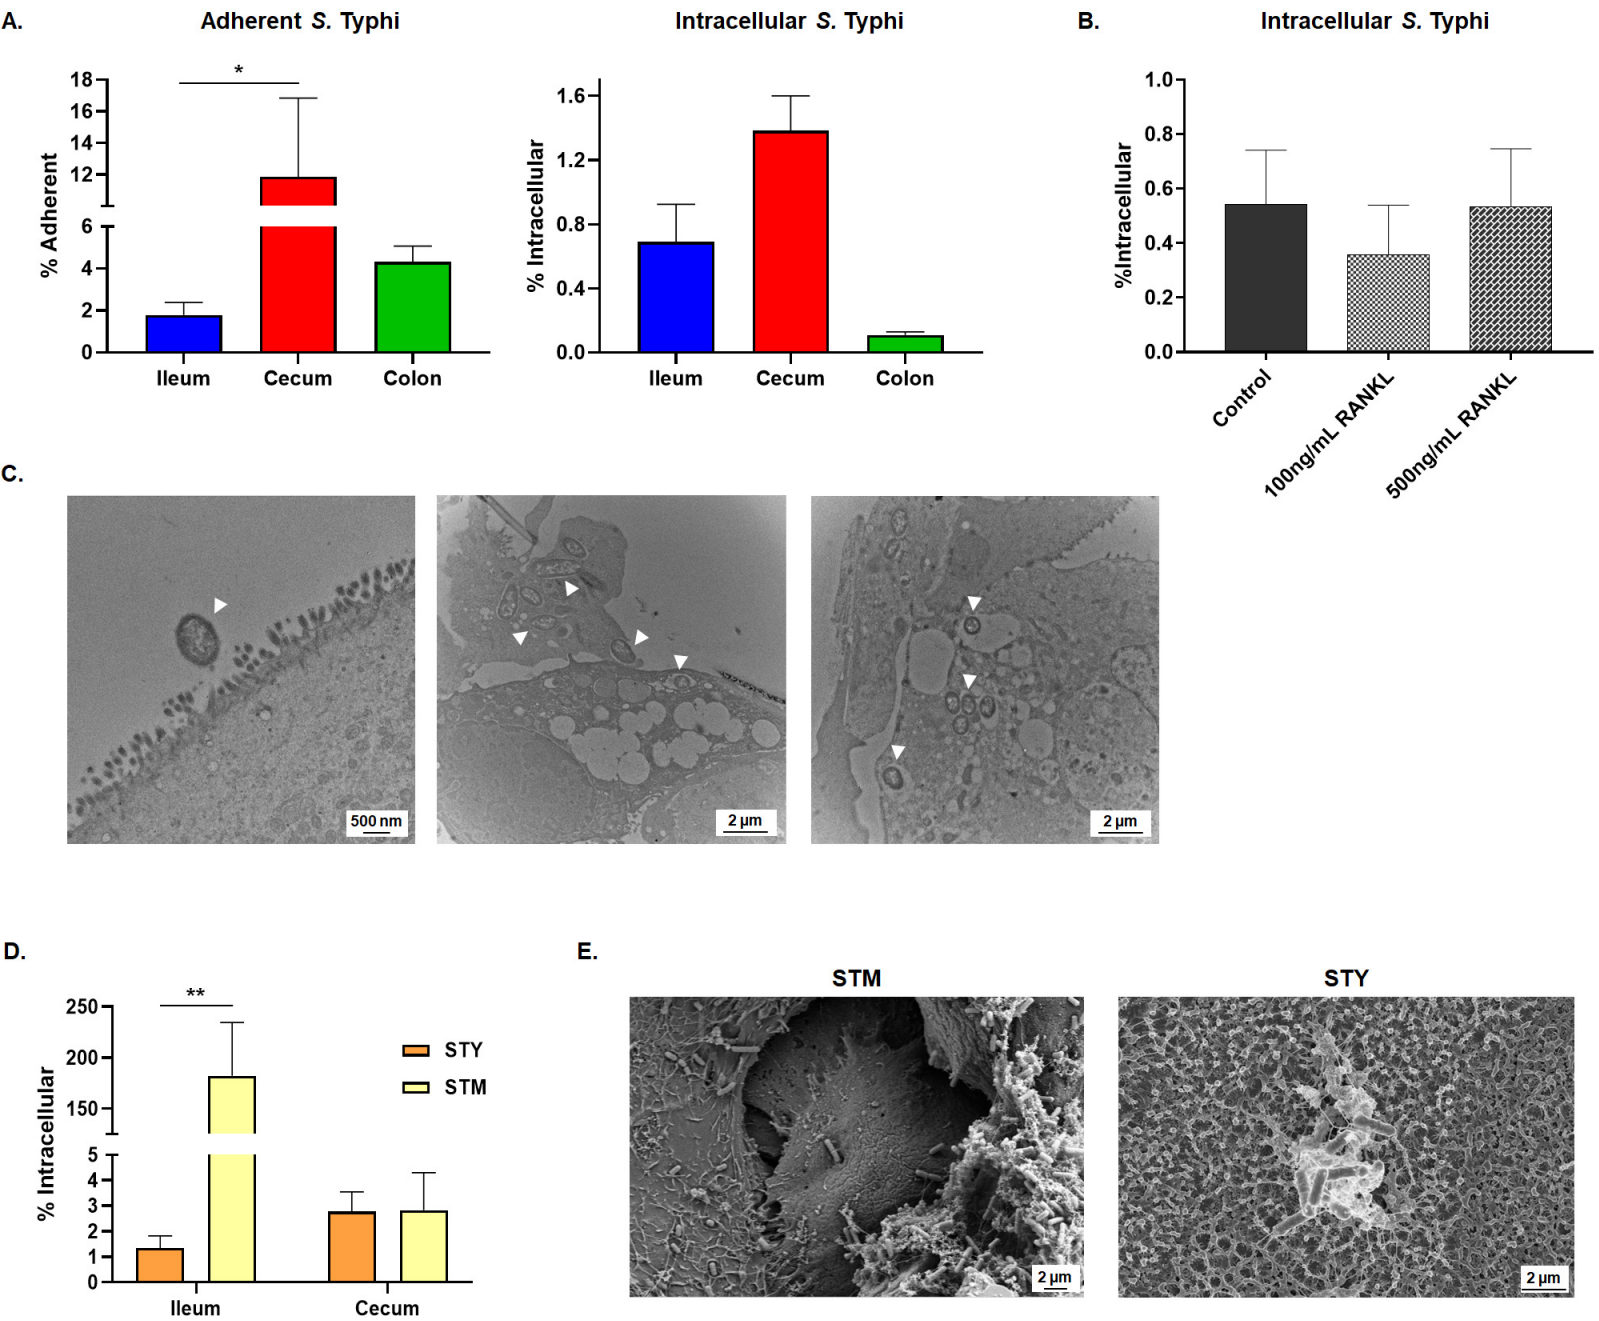



Figure 6

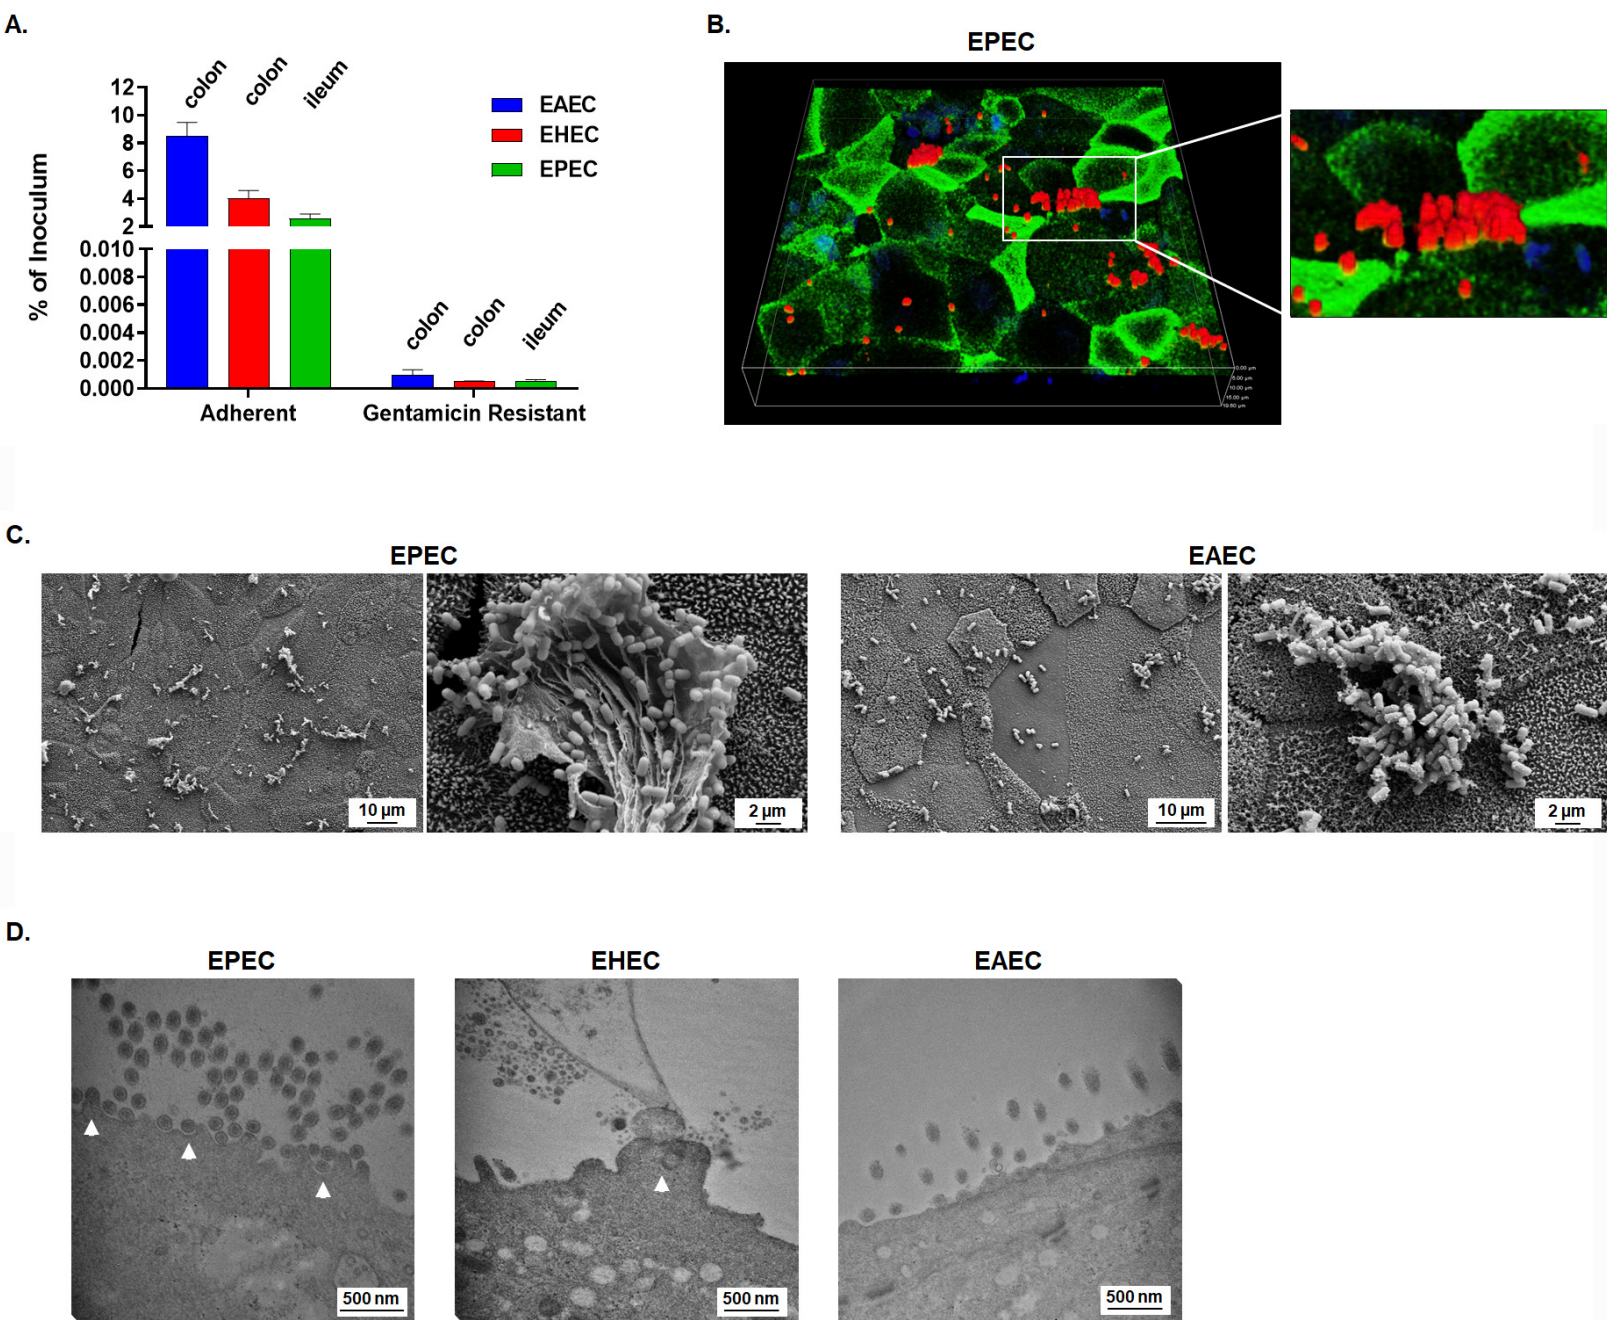

Source: https://www.biorxiv.org/content/biorxiv/early/2020/11/25/2020.11.24.397141.full.pdf
